# Supplementary material for: Association of body mass index and age with incident diabetes in Chinese adults: a population-based cohort study
Source: PubMed Central journal article supplement — BMJ Open. 2018 Sep 28;8(9):e021768. doi: 10.1136/bmjopen-2018-021768 (PMC6169758; doi:10.1136/bmjopen-2018-021768), 2018-09-28
Supplement: bmjopen-2018-021768.draft_revisions.pdf [file bmjopen-2018-021768.draft_revisions.pdf]

# BMJ Open

BMJ Open is committed to open peer review. As part of this commitment we make the peer review history of every article we publish publicly available.

When an article is published we post the peer reviewers' comments and the authors' responses online. We also post the versions of the paper that were used during peer review. These are the versions that the peer review comments apply to.

The versions of the paper that follow are the versions that were submitted during the peer review process. They are not the versions of record or the final published versions. They should not be cited or distributed as the published version of this manuscript.

BMJ Open is an open access journal and the full, final, typeset and author-corrected version of record of the manuscript is available on our site with no access controls, subscription charges or pay-per-view fees (<http://bmjopen.bmj.com>).

If you have any questions on BMJ Open's open peer review process please email [info.bmjopen@bmj.com](mailto:info.bmjopen@bmj.com)

# BMJ Open

## Association of body mass index and age with incident diabetes in Chinese adults

|                               |                                                                                                                                                                                                                                                                                                                                                                                                                                                                                                                                                                                                                                                                                                                                                                                                                                                                                                                                                                                                                                                                                                                                                                                                                                                                                                                                        |
|-------------------------------|----------------------------------------------------------------------------------------------------------------------------------------------------------------------------------------------------------------------------------------------------------------------------------------------------------------------------------------------------------------------------------------------------------------------------------------------------------------------------------------------------------------------------------------------------------------------------------------------------------------------------------------------------------------------------------------------------------------------------------------------------------------------------------------------------------------------------------------------------------------------------------------------------------------------------------------------------------------------------------------------------------------------------------------------------------------------------------------------------------------------------------------------------------------------------------------------------------------------------------------------------------------------------------------------------------------------------------------|
| Journal:                      | <i>BMJ Open</i>                                                                                                                                                                                                                                                                                                                                                                                                                                                                                                                                                                                                                                                                                                                                                                                                                                                                                                                                                                                                                                                                                                                                                                                                                                                                                                                        |
| Manuscript ID                 | bmjopen-2018-021768                                                                                                                                                                                                                                                                                                                                                                                                                                                                                                                                                                                                                                                                                                                                                                                                                                                                                                                                                                                                                                                                                                                                                                                                                                                                                                                    |
| Article Type:                 | Research                                                                                                                                                                                                                                                                                                                                                                                                                                                                                                                                                                                                                                                                                                                                                                                                                                                                                                                                                                                                                                                                                                                                                                                                                                                                                                                               |
| Date Submitted by the Author: | 26-Jan-2018                                                                                                                                                                                                                                                                                                                                                                                                                                                                                                                                                                                                                                                                                                                                                                                                                                                                                                                                                                                                                                                                                                                                                                                                                                                                                                                            |
| Complete List of Authors:     | <p>Chen, Ying; Department of Endocrinology and Metabolism, Affiliated Hospital of Nantong University</p> <p>Zhang, Xiaoping; Department of health examination, Rich Healthcare Group</p> <p>Cai, Bo; Nantong Center for Chronic and Noncommunicable Disease Control and Prevention, Center for Disease Control and Prevention</p> <p>Wang, Xiaoli; Department of health examination, Rich Healthcare Group</p> <p>Wu, Xiaoli; Department of health examination, Rich Healthcare Group</p> <p>Zhang, Yuehua; Department of health examination, Rich Healthcare Group</p> <p>Yuan, Jin; Department of Endocrinology and Metabolism, Affiliated Hospital of Nantong University</p> <p>Tang, Zhuqi; Department of Endocrinology and Metabolism, Affiliated Hospital of Nantong University</p> <p>Yin, Tong; Department of Endocrinology and Metabolism, Affiliated Hospital of Nantong University</p> <p>Zhu, Xiaohui; Department of Endocrinology and Metabolism, Affiliated Hospital of Nantong University</p> <p>Gu, Yunjuan; Department of Endocrinology and Metabolism, Affiliated Hospital of Nantong University</p> <p>Cui, Shiwei; Department of Endocrinology and Metabolism, Affiliated Hospital of Nantong University</p> <p>Li, Xiaoying; Department of Endocrinology and Metabolism, Zhongshan Hospital, Fudan University</p> |
| Keywords:                     | type 2 diabetes, body mass index, young onset diabetes, aging                                                                                                                                                                                                                                                                                                                                                                                                                                                                                                                                                                                                                                                                                                                                                                                                                                                                                                                                                                                                                                                                                                                                                                                                                                                                          |
|                               |                                                                                                                                                                                                                                                                                                                                                                                                                                                                                                                                                                                                                                                                                                                                                                                                                                                                                                                                                                                                                                                                                                                                                                                                                                                                                                                                        |

SCHOLARONE™  
Manuscripts

## Association of body mass index and age with incident diabetes in Chinese adults

Ying Chen<sup>a\*</sup>, Xiao-Ping Zhang<sup>b\*</sup>, Bo Cai<sup>c</sup>, Xiao-Li Wang<sup>b</sup>, Xiao-Li Wu<sup>b</sup>, Yue-Hua Zhang<sup>b</sup>, Jin Yuan<sup>a</sup>, Zhu-Qi Tang<sup>a</sup>, Tong Yin<sup>a</sup>, Xiao-Hui Zhu<sup>a</sup>, Yun-Juan Gu<sup>a</sup>, Shi-Wei Cui<sup>a§</sup>, Xiao-Ying Li<sup>c,d§</sup>

- a. Department of Endocrinology and Metabolism, Affiliated Hospital of Nantong University, Nantong, Jiangsu, China
- b. Department of health examination, Rich Healthcare Group, China
- c. Department of Endocrinology and Metabolism, Zhongshan Hospital, Fudan University, Shanghai, China
- d. Institute of Chronic Metabolic Diseases, Fudan University, Shanghai, China
- e. Nantong Center for Chronic and Noncommunicable Disease Control and Prevention, Center for Disease Control and Prevention, Nantong, Jiangsu, China

\* Ying Chen and Xiao-Ping Zhang contributed equally to this paper.

§ Shi-Wei Cui and Xiao-Ying Li contributed equally to this paper.

§Correspondence to Xiao-Ying Li, Tel: 86-21-64041990; Email address:

[lixxy@sibs.ac.cn](mailto:lixxy@sibs.ac.cn).

**Running head:** Effect of BMI and age on incident diabetes

**Key terms:** type 2 diabetes, body mass index, age, young-onset diabetes

**Conflict of interest:**

The authors declare no conflicts of interest.

**Financial support:**

The authors thank the field investigators for their contribution and the participants for their cooperation. This work is supported by grants from the National Key Research and Development Program of China (No.2016YFC1304801), the Natural Science Foundation of Nantong (HS2014036), the six talent peaks project in Jiangsu Province (WSN-098), the open research project of Shanghai Key Laboratory of Diabetes Mellitus (SHKLD-KF-1303).

**Authors' contributions:**

YC, XZ, SC and XL participated in study concept and design. YC, XZ, XW, XW, and YZ did the data collection. YC, BC, JY, ZT, TY, XZ, YG participated in the analysis and interpretation of the data, and drafted the manuscript. XL, SC and YC revised the manuscript and approved the final version of the manuscript. All authors approved the final version of the manuscript.

**Data sharing statement:**

No additional data sharing available.

## Abstract

**Objective** Type 2 diabetes mellitus is increasing in young adults and greater adiposity is considered as a major risk factor. However, whether the heterogeneity of the association existed among young, middle, and old adults is little known. We investigated the association of BMI with incidence of diabetes in wide range of age groups (20-30, 30-40, 40-50, 50-60, 60-70,  $\geq 70$ ), and modifying effect of younger age was further explored.

**Design** A retrospective cohort study using a healthy screening program data.

**Setting** A total of 211,833 adult Chinese aged more than 20 years old, who were free of diabetes at baseline, were resident in 32 sites from 11 cities in China (Shanghai, Beijing, Nanjing, Suzhou, Shenzhen, Changzhou, Chengdu, Guangzhou, Hefei, Wuhan, Nantong).

**Primary and secondary outcome measures** Fasting plasma glucose level was measured and information of history of diabetes was collected at each visit. Diagnosis of incident diabetes was made according to 1999 WHO criteria. Patients were censored at the date of diagnosis of diabetes or the final visit, whichever came first.

**Results** In a median follow-up of 3.1 years, 4174 of 211,833 participants developed diabetes, with an age-adjusted incidence rate of 7.35 per 1000 persons. The risk of incident diabetes increased by dose-responsive manner of baseline BMI values, with 23% increased risk of incident diabetes by each  $\text{kg/m}^2$  increase of BMI (95%CI: 1.22, 1.24). Across all age groups (20-30, 30-40, 40-50, 50-60, 60-70,  $\geq 70$ ) respectively, the linear association between BMI and risk of incident diabetes always existed, and a

1  
2  
3 stronger association of BMI and incident diabetes was shown in younger age group  
4  
5  
6 (age  $\times$  BMI interaction,  $P < 0.0001$ ).  
7

8 **Conclusions** An increased BMI is also independently associated with a higher risk of  
9  
10 developing diabetes in young adults and effect of BMI on incident diabetes was  
11  
12 accentuated in younger age adults.  
13  
14

15 **Key terms:** type 2 diabetes, body mass index, age, young-onset diabetes  
16  
17  
18  
19  
20  
21  
22  
23  
24  
25  
26  
27  
28  
29  
30  
31  
32  
33  
34  
35  
36  
37  
38  
39  
40  
41  
42  
43  
44  
45  
46  
47  
48  
49  
50  
51  
52  
53  
54  
55  
56  
57  
58  
59  
60

1  
2  
3 Strengths and limitations of this study:  
4

- 5
- 6 1. The large sample size allows analysis of the interaction of age and BMI on  
7  
8 incident diabetes.  
9
  - 10 2. Our study was comprised of young, middle, and old-aged apparently healthy  
11  
12 adults, while participants in many other cohorts tended to be older.  
13
  - 14 3. The data was collected under standardized conditions and followed according to  
15  
16 uniform procedures by trained staff. Laboratory methods also were carefully  
17  
18 standardized with rigorous internal and external quality controls.  
19  
20  
21  
22
  - 23 4. We only measured body weight and height at baseline, which could not address  
24  
25 fat distribution and weigh change.  
26
- 27  
28  
29  
30  
31  
32  
33  
34  
35  
36  
37  
38  
39  
40  
41  
42  
43  
44  
45  
46  
47  
48  
49  
50  
51  
52  
53  
54  
55  
56  
57  
58  
59  
60

review only

1  
2  
3  
4 Type 2 diabetes is worldwide epidemic. The IDF estimates that about 415 million  
5  
6 people worldwide had type 2 diabetes mellitus in 2015. This number is expected to  
7  
8 rise to 642 million by 2040, with 140.2 million of affected people living in Asia [1].  
9  
10 Although diabetes has traditionally been thought of as a disease that affects elderly  
11  
12 people, the prevalence of type 2 diabetes in young adults is increasing. The national  
13  
14 surveys in China reported that 7.09% individuals had developed diabetes younger  
15  
16 than 40 years in 2011, while it was less than 1% two decades ago [2]. Those younger  
17  
18 diabetic patients would have poorer prognosis; risk of cardiovascular disease and  
19  
20 microvascular complications was greater increased [3, 4]. The reasons for the  
21  
22 declining age at onset of type 2 diabetes are complicated; it was speculated the  
23  
24 increasing prevalence of obesity in young-aged individuals might partly contribute to  
25  
26 the epidemic of diabetes in young people [5].  
27  
28  
29  
30  
31

32  
33 Greater adiposity is a major risk factor for development of type 2 diabetes. A  
34  
35 meta-analysis combining 18 prospective cohort studies reported that the overall RR of  
36  
37 diabetes for obese persons compared to those with normal weight was 7.19 (95% CI:  
38  
39 5.74, 9.00) and for overweight was 2.99 (95% CI: 2.42, 3.72) [6]. Obesity and  
40  
41 diabetes are so related that was deemed as “diabesity” [7]. Of note, they are all  
42  
43 age-related [8, 9]. Younger age itself is a protective factor of incident diabetes, with  
44  
45 per 10 years decrease of age, the risk of developing diabetes decrease by 50%-70%  
46  
47 [10]. However, obesity prevalent in young seemed to weaken the protective effect of  
48  
49 age on diabetes. The NCD Risk Factor Collaboration pooled 128·9 million children,  
50  
51 adolescents, and adults to assess worldwide trends in body-mass index, underweight,  
52  
53  
54  
55  
56  
57  
58  
59  
60



1  
2  
3  
4 overweight, and obesity from 1975 to 2016 and found that the mean BMI and obesity  
5  
6 prevalence in adolescents and young adults is rising in past decades, and the trend is  
7  
8 still continuing [11]. However, heterogeneous and differences effect of BMI on  
9  
10 obesity-related disease between young adults and the elder remained inconsistent. It  
11  
12 was found that the risk of mortality by per unit increase of BMI is greater in younger  
13  
14 than in older people [12]. However, the modified effect of age on the association  
15  
16 between BMI and kidney disease seems the opposite [13]. The heterogeneity of the  
17  
18 association for diabetes in young, middle, and old adults has rarely explored. Asia  
19  
20 Pacific Cohort Studies Collaboration pooled twenty-seven cohorts from Asia, New  
21  
22 Zealand and Australia found that the association between BMI and risk of diabetes  
23  
24 was stronger in participants aged less than 60 years old compared with 60-69 age  
25  
26 group and more than 70 age group [14]. Of note, the conclusion was derived from  
27  
28 older adults whom aged more than 40 years old. Whether it can generalize to young  
29  
30 adults, which age group was rarely paid attention for risk of developing diabetes in  
31  
32 the past but currently increased diabetes were occurred, is unknown. Therefore, in the  
33  
34 present study, we investigated the association of BMI and risk of incident diabetes in  
35  
36 a large retrospective cohort ranging from 20 to 99 years old, and further whether the  
37  
38 heterogeneity of the association existed in young adults compared with older adults  
39  
40 was investigated.  
41  
42  
43  
44  
45  
46  
47  
48  
49  
50  
51  
52  
53  
54  
55  
56  
57  
58  
59  
60

## METHODS

### Study design and participants

Data were extracted from a computerized database established by Rich Healthcare Group, China which includes all medical records for the participants who receive the health check from 2010 to 2016. The present analysis initially included all study participants aged equal to or more than 20 years old with at least two visits between 2010 to 2016 (n=685277). Participants were excluded at baseline if they had no available weight and height measurements (n=103946), no available information for gender (n=1), extreme BMI values ( $<15 \text{ kg/m}^2$  or  $>55 \text{ kg/m}^2$ ) (n=152), or no available fasting plasma glucose value (n=31370). We further excluded participants of visit interval less than 2 years (n=324233), participants diagnosed of diabetes at baseline (2997 participants diagnosed by self-reported and 4115 diagnosed by fasting plasma glucose  $\geq 7.0 \text{ mmol/L}$ ), and participants with status of diabetes undefined at follow up (n=6630). Finally, a total of 211833 participants (116123 male and 95710 female) were included in the analysis. Cohort entry was defined as the date of the initial visit.

This study has been approved by the Rich Healthcare Group Review Board. And the information was retrieved retrospectively.

In each visit to the health check center, participants were requested to complete a detailed questionnaire assessing demographic, lifestyle, medical history and family history of chronic disease. Height, weight, and blood pressure are measured by trained staffs. Body weight was measured in light clothing with no shoes to the nearest 0.1 kg. Height was measured to the nearest 0.1cm. Body mass index was derived from weight

1  
2  
3 in kilograms divided by height in meters squared. Blood pressure was measured by  
4  
5  
6 standard mercury sphygmomanometers.  
7

8 Fasting venous blood samples were collected after at least 10-h fast at each visit.  
9  
10 Serum triglyceride (TG), total cholesterol (TC), low density lipoprotein cholesterol  
11 (LDL-C), and high density lipoprotein cholesterol (HDL-C), were measured on the  
12  
13 autoanalyser (Beckman 5800). Plasma glucose levels were measured by glucose  
14  
15 oxidase method on an autoanalyser (Beckman 5800).  
16  
17  
18  
19  
20  
21  
22

### 23 **Ascertainment of incident diabetes**

24  
25 Diagnosis of incident diabetes was made according to 1999 WHO criteria, with  
26  
27 fasting plasma glucose of  $\geq 7.00$  mmol/L or self-reported diabetes during the  
28  
29 follow-up period. Patients were censored at the date of diagnosis of diabetes or the  
30  
31 final visit, whichever came first.  
32  
33  
34  
35  
36  
37

### 38 **Statistical analysis**

39  
40 Statistical analyses were performed on SAS 9.3 (SAS Institute, Cary, NC). A  
41  
42 two-sided *P* value less than 0.05 was considered as statistical significance. Data from  
43  
44 descriptive analyses were reported as mean (SD), or median (IQR), or proportions.  
45  
46 Participants were stratified into six baseline age groups with 10-year increments  
47  
48 starting from 20-30 years old to over 70 years old. Linear regression models were  
49  
50 performed to assess the relationship of BMI, metabolic parameters, lifestyles, and  
51  
52 family history of diabetes with age. Diabetes incidence was calculated in each and  
53  
54  
55  
56  
57  
58  
59  
60

1  
2  
3 total age groups, and age-standardized diabetes incidence was adjusted to the Chinese  
4 population in 2010 [15].  
5  
6

7  
8 Cox proportional hazard regression models were performed to estimate  
9 BMI-adjusted and multivariable-adjusted hazard ratios (95% confidence intervals) of  
10 age with incident diabetes, and age-adjusted and multivariable-adjusted hazard ratios  
11 (95% confidence intervals) of BMI with incident diabetes. Analyses of BMI used  
12 predefined standard categories according to Chinese criteria of obesity [16]:  
13 underweight ( $<18.5\text{kg/m}^2$ ), normal weight ( $18.5\text{-}<24.0\text{ kg/m}^2$ ), overweight  
14 ( $24.0\text{-}<28.0\text{ kg/m}^2$ ), and obesity ( $\geq 28.0\text{ kg/m}^2$ ). The normal BMI group ( $18.5\text{-}<24.0$   
15  $\text{kg/m}^2$ ) was chosen as the referent category. Covariates in the multivariable models  
16 included age, sex, smoking status, drinking status, family history of diabetes. The  
17 association of BMI with incident diabetes influenced by age was further investigated.  
18 Hazard ratios (HRs) of incident diabetes were calculated respectively in each age  
19 group by Cox proportional hazard regression models with BMI of  $18.5\text{-}<24.0\text{ kg/m}^2$   
20 as the reference category. Since the associations of BMI with risk of incident diabetes  
21 were approximately linear, the HRs and corresponding 95%CI for incident diabetes  
22 across all age groups were estimated for per  $\text{kg/m}^2$  increase of BMI value. The  
23 modification effect was assessed for interaction of age and BMI in the Cox model.  
24  
25  
26  
27  
28  
29  
30  
31  
32  
33  
34  
35  
36  
37  
38  
39  
40  
41  
42  
43  
44  
45  
46

47 In consideration of the baseline confounding factors including smoking status,  
48 and family history of diabetes were considered related to diabetes in young adult,  
49 subgroup analyses were further performed respectively HR of smoking status, and  
50 family history of diabetes on the risk of diabetes. And interaction of BMI\*current  
51  
52  
53  
54  
55  
56  
57  
58  
59  
60

1  
2  
3  
4  
5  
6  
7  
8  
9  
10  
11  
12  
13  
14  
15  
16  
17  
18  
19  
20  
21  
22  
23  
24  
25  
26  
27  
28  
29  
30  
31  
32  
33  
34  
35  
36  
37  
38  
39  
40  
41  
42  
43  
44  
45  
46  
47  
48  
49  
50  
51  
52  
53  
54  
55  
56  
57  
58  
59  
60

smoker, age\*family history of diabetes were assessed in Cox model.

For peer review only

## RESULTS

211,833 participants (116123 male and 95710 female) without diabetes at baseline were recruited. The mean age was 42.1 years old (SD 12.6), ranging from 20 to 99 years old. The mean BMI value was 23.2 kg/m<sup>2</sup> (SD 3.3). Baseline clinical and biochemical characteristics of participants stratified by age and sex are presented in Table 1. BMI, total serum cholesterol, triglyceride, and LDL-C, fasting plasma glucose, systolic blood pressure, and diastolic blood pressure were gradually increased with age increase respectively in men and women.

During a median of 3.1 year follow-up (660,191 person-years), 4174 of 211,833 participants developed diabetes. The incidence of diabetes was 7.35 per 1000 person-year with age-standardization (Table 2). The risk of incident diabetes was increased by dose-responsive manner of baseline age and BMI values (Table 2). With per 10 years increase of age, the HR of developing diabetes increased by 88% (95%CI: 1.85, 1.92). Taken participants aged 20-30 years old as reference, BMI-adjusted HR for incident diabetes was 1.64 (95%CI: 1.29-2.09) in participants aged 30-40 years old, 3.83 (95%CI: 3.03, 4.86) in participants aged 40-50 years old, 8.39 (95%CI: 6.64, 10.59) in participants aged 50-60 years old, 11.77 (95%CI: 9.30, 14.89) in participants aged 60-70 years old, and 17.55 (95%CI: 13.79, 22.33) in participants aged ≥70 years old. Taken participants with BMI of 18.5-<24.0 kg/m<sup>2</sup> as reference, age-adjusted HR for incident diabetes was 0.39 (95%CI: 0.27-0.56) in participants with BMI of <18.5 kg/m<sup>2</sup>, 2.51 (95%CI: 2.33, 2.70) with BMI of 24.0-27.9 kg/m<sup>2</sup>, and 5.58 (95%CI: 5.13, 6.07) with BMI of ≥28.0 kg/m<sup>2</sup>. Further adjustment for sex,

1  
2  
3 smoking status, drinking status, and family history of diabetes did not alter the trend  
4  
5 appreciably.  
6  
7

8 Sex-adjusted HRs (95%CI) of BMI for risk of incident diabetes was shown in  
9  
10 Figure 1 and Supplementary Table 1. Taken participants with BMI of 18.5-<24.0  
11  
12 kg/m<sup>2</sup> as reference, age-adjusted HR for incident diabetes for overweight and obesity  
13  
14 were higher at younger ages than older ages. The linear association between BMI and  
15  
16 risk of incident diabetes existed in participants across all age groups. When BMI was  
17  
18 analyzed as a continuous variable, sex-adjusted HR of developing diabetes was 1.23  
19  
20 (95%CI: 1.22, 1.24) for each kg/m<sup>2</sup> increase of BMI. A stronger association of BMI  
21  
22 and incident diabetes was shown in younger age group (Table 3). The risk of incident  
23  
24 diabetes was increased by 35% (95%CI: 1.29, 1.40) for each kg/m<sup>2</sup> increase of BMI  
25  
26 in 20-30 years old group, 31% (95%CI: 1.29, 1.33) in 30-40 years old group, 27%  
27  
28 (95%CI: 1.25, 1.29) in 40-50 years old group, 18% (95%CI: 1.17, 1.20) in 50-60  
29  
30 years old group, 13% (95%CI: 1.11, 1.15) in 60-70 years old group, and 11% (95%CI:  
31  
32 1.08, 1.14) in greater than 70 years old group. The descending trend by age was not  
33  
34 altered by further adjustment of smoking status, drinking status, family history of  
35  
36 diabetes. Obviously, age significantly modified the association of BMI and risk of  
37  
38 incident diabetes (age × BMI interaction,  $P < 0.0001$ ).  
39  
40  
41  
42  
43  
44  
45  
46

47 Current smokers were at a decreased risk of incident diabetes (HR: 0.79; 95%CI:  
48  
49 0.74, 0.84), and participants with family history of diabetes were at an increased risk  
50  
51 of incident diabetes (HR: 1.68; 95%CI:1.38-2.03). The multiplicative interactions of  
52  
53 BMI × smoking status ( $P$  for interaction=0.25), age × family history of diabetes ( $P$  for  
54  
55  
56  
57  
58  
59  
60

1  
2  
3 interaction=0.71) for the risk of incident diabetes were not detected (Supplementary  
4  
5  
6 table 2).  
7  
8  
9  
10  
11  
12  
13  
14  
15  
16  
17  
18  
19  
20  
21  
22  
23  
24  
25  
26  
27  
28  
29  
30  
31  
32  
33  
34  
35  
36  
37  
38  
39  
40  
41  
42  
43  
44  
45  
46  
47  
48  
49  
50  
51  
52  
53  
54  
55  
56  
57  
58  
59  
60



## DISCUSSION

In the present cohort, an age-standardized diabetes incidence of 7.35 per 1000 person-year during 2010-2016 was detected. We demonstrated a linear association between baseline BMI and risk of developing diabetes, with increased each kg/m<sup>2</sup> of BMI associated with 23% (95%CI: 1.22, 1.24) higher risk of incident diabetes. The risk of incident diabetes was increased by 35% (95%CI: 1.29, 1.40) for each kg/m<sup>2</sup> increase of BMI in 20-30 years old group, 31% (95%CI: 1.29, 1.33) in 30-40 years old group, and slightly lower in 40-50 years old group, 50-60 years old group, 60-70 years old group, and more than 70 years old group, with HR of 1.27 (95%CI: 1.25, 1.29), 1.18 (95%CI: 1.17, 1.20), 1.13 (95%CI: 1.11, 1.15), 1.11 (95%CI: 1.08, 1.14), respectively. Further analyses showed that age had a modifying effect on the association. Effect of BMI on incident diabetes was stronger in young adults. Subgroup analyses showed that the interactions of BMI × smoking status and age × family history of diabetes for the risk of incident diabetes were not detected.

Our study reported an age-standardized diabetes incidence of 7.35 per 1000 person-year during 2010-2016. With lifestyle changes, prevalence of type 2 diabetes has increased rapidly in the past decades in China. Data from national surveys showed that the prevalence of diabetes was 0.9% in 1980 [18], 2.5% in 1994 [19], 9.7% in 2007 [20], and 10.9% in 2013 [21]. However, the incidence of diabetes appears to have stabilized and there have been small declines from 2007 to 2014 [22], which is inconsistent with the prevalence trend. As from our large sample cohort, cases of diabetes increased by 7.35 per 1000 person-year between 2010 and 2016. All diabetes

1  
2  
3 diagnoses was based on self-reported diabetes combined with fasting glucose level  
4  
5 equal to or more than 7.0 mmol/L. Regarding to the high intake of carbohydrate,  
6  
7 Chinese is characteristic of impaired post load glucose regulation. The definition  
8  
9 lacking of 2 h postprandial plasma glucose assessment might underestimate the true  
10  
11 incidence of diabetes. However, 2h postprandial plasma glucose assessed by an oral  
12  
13 glucose-tolerance test is not suitable for large sample surveys.  
14  
15  
16

17  
18 Obesity is the major risk factor for diabetes development. Hartemink N et al.  
19  
20 conducted a meta-analyses with a dose-response relationship between body mass  
21  
22 index and type 2 diabetes detected. It was shown that, with per  $\text{kg/m}^2$  increase of BMI,  
23  
24 the risk of diabetes increased by 18% (95% CI: 1.16-1.20), accounting for the  
25  
26 heterogeneity of studies [23]. The etiological effect of BMI was mostly derived from  
27  
28 European population, Chinese individuals tend to have a higher diabetes risk, and  
29  
30 increased risk in other diabetes risk factors with per unit increase of BMI have been  
31  
32 reported [24, 25]. In the present study, age-adjusted HR for incident diabetes was 2.51  
33  
34 (95%CI: 2.33, 2.70) in overweight individuals with BMI of 24.0-27.9  $\text{kg/m}^2$ , and 5.58  
35  
36 (95%CI: 5.13, 6.07) in obese individuals with BMI of  $\geq 28.0$   $\text{kg/m}^2$ , compared with  
37  
38 normal weight individuals with BMI of 18.5-<24.0  $\text{kg/m}^2$ . Our HR of risk of diabetes  
39  
40 incidence with per  $\text{kg/m}^2$  increase of BMI was 1.23 (95% CI: 1.22-1.24), which was  
41  
42 slightly higher than previous reported [23]. Moreover, it was interesting to find that  
43  
44 HR was significantly higher in earlier adulthood aged less than 40 years old.  
45  
46  
47  
48  
49  
50

51  
52 Young age itself is a remarkable protective factor for developing diabetes. Whilst  
53  
54 most of the increase in the prevalence of T2DM has been seen in the middle-aged and  
55  
56  
57  
58  
59  
60

1  
2  
3 elderly, there is strong evidence that it is becoming more common among young  
4  
5 adults. Increasing prevalence of obesity in young individuals has been speculated to  
6  
7 partly explain the increasing prevalence of diabetes in young adults. However,  
8  
9 available data on diabetes in young are rare. Recent studies have shown the  
10  
11 association between BMI and its outcomes varied in younger adults vs old adults. The  
12  
13 global BMI mortality collaboration including 239 prospective studies in four  
14  
15 continents found that risk of mortality with per units increase of BMI was greater in  
16  
17 younger than older people [12], however, the modified effect of age on the association  
18  
19 between BMI and kidney disease seems the opposite [13]. The heterogeneity of age on  
20  
21 the association of obesity and type 2 diabetes has been assessed in only a few studies  
22  
23 and the results were inconsistent. Data from the Third National Health and Nutrition  
24  
25 Examination Survey showed that BMI was strongly associated with increased relative  
26  
27 risk of metabolic disorders including type 2 diabetes and cardiovascular diseases;  
28  
29 Furthermore, the association between BMI and cardiovascular disease and  
30  
31 hypertension was attenuated with age increased. However, the modifying effect of age  
32  
33 on the association between BMI and type 2 diabetes was not detected [26].  
34  
35 Meta-analysis data from Japan, Australia and New Zealand, respectively  
36  
37 demonstrated a stronger association between BMI and risk of diabetes in subjects  
38  
39 aged less than 60 years as compared with those aged over 70 years [27]. However,  
40  
41 included individuals were most middle and elderly aged. The limited sample size and  
42  
43 age range might contribute to the disparity. Avoiding these factors, we found a  
44  
45 generally consistent linear association between BMI and incident diabetes that  
46  
47  
48  
49  
50  
51  
52  
53  
54  
55  
56  
57  
58  
59  
60

1  
2  
3 weakened by increasing age. BMI had a much greater risk on incident diabetes in  
4  
5  
6 earlier adulthood than in later adulthood, which was consistent with the findings from  
7  
8  
9 meta analysis conducted by Ni Mhurchu C et al [27], and extending the finding to  
10  
11 adults less than 40 years old.

12  
13 The mechanism of heterogeneity of BMI effect between earlier adulthood vs  
14  
15 later adulthood is unclear. Young onset obesity adulthood are reported to have  
16  
17 chronically increased levels of circulating free fatty acids and adipokines, which  
18  
19 reduce insulin sensitivity and might contribute to increased reactive oxygen species  
20  
21 and impaired insulin secretion [28, 29]. Furthermore, young onset obesity patients  
22  
23 might have an early life exposure to maternal undernutrition or over-nutrition, which  
24  
25 are associated with an increased risk of type 2 diabetes [30, 31]. And young onset  
26  
27 obesity individuals tend to have a detrimental lifestyle, which might also contribute to  
28  
29 development of adiposity, insulin resistance, hyperglycaemia, and other  
30  
31 cardiovascular risk factors in young people [32, 33]. Therefore, obese youth were led  
32  
33 to lose the relative protection of youth.  
34  
35  
36  
37  
38  
39

40 Smoking is a concern in analysis of BMI and diabetes because it is associated  
41  
42 with decreased body weight and an increased risk of diabetes [34]. In our study,  
43  
44 smoking status was statistically adjusted. And interaction of BMI\*smoking status on  
45  
46 the risk of incident diabetes was explored, and no statistical significance was found.  
47  
48  
49 Previous studies have reported type 2 diabetes in youth usually had positive family  
50  
51 history of diabetes [35]. Similar in our study, family history of diabetes is an  
52  
53 independent risk factor for type 2 diabetes. However, no interaction of age\*family  
54  
55  
56  
57  
58  
59  
60

1  
2  
3 history of diabetes had been detected.  
4  
5

6 Addition to the large sample size, the major strength of our study is that our  
7  
8 sample was comprised of young, middle, and old-aged apparently healthy adults,  
9  
10 while participants in many other cohorts tended to be older. And the data was  
11  
12 collected under standardized conditions and followed according to uniform  
13  
14 procedures by trained staff. Laboratory methods also were carefully standardized with  
15  
16 rigorous internal and external quality controls. Some limitations also existed in our  
17  
18 present study. We did not distinguish between type 1 and type 2 diabetes in the  
19  
20 present study. However, because type 2 diabetes accounts for about 95% of all  
21  
22 diabetes, our findings are likely more representative of type 2 diabetes [36]. And we  
23  
24 only measured body weight and height at baseline, which could not address fat  
25  
26 distribution and weigh change.  
27  
28  
29  
30  
31

32  
33 In summary, we demonstrated BMI is independently associated with increased  
34  
35 risk of incident diabetes not only in later adults but also in earlier adults, and  
36  
37 importantly extend existing knowledge to show BMI had much greater effect on  
38  
39 incident diabetes in younger aged adults. This novel observation might partly explain  
40  
41 the emerging epidemic of young-onset diabetes is driven by overweight and obesity in  
42  
43 China. Strategically, it is crucial to prevent diabetes by controlling the overweight and  
44  
45 obesity, particularly in younger adults.  
46  
47  
48  
49  
50  
51  
52  
53  
54  
55  
56  
57  
58  
59  
60

**Reference:**

1. IDF Atlas: About 415 Million Adults Worldwide Have Diabetes. Medscape December 02, 2015.
2. Li MZ, Su L, Liang BY, Tan JJ, Chen Q, Long JX, et al. Trends in prevalence, awareness, treatment, and control of diabetes mellitus in mainland china from 1979 to 2012. *International journal of endocrinology* 2013;2013:753150.
3. Huo X, Gao L, Guo L, Xu W, Wang W, Zhi X, et al. Risk of non-fatal cardiovascular diseases in early-onset versus late-onset type 2 diabetes in China: a cross-sectional study. *The lancet Diabetes & endocrinology* 2016; 4:115-24.
4. Li L, Ji L, Guo X, Ji Q, Gu W, Zhi X, et al. Prevalence of microvascular diseases among tertiary care Chinese with early versus late onset of type 2 diabetes. *Journal of diabetes and its complications* 2015; 29:32-7.
5. Song, S. H. Emerging type 2 diabetes in young adults. *Adv. Exp. Med. Biol.* 771, 51–61 (2012).
6. Abdullah A, Peeters A, de Courten M, Stoelwinder J. The magnitude of association between overweight and obesity and the risk of diabetes: a meta-analysis of prospective cohort studies. *Diabetes research and clinical practice* 2010;89:309-19.
7. Kalra S. Diabetesity. *J Pak Med Assoc.* 2013;63(4):532–4.
8. Houston DK, Nicklas BJ, Zizza CA. Weighty concerns: the growing prevalence of obesity among older adults. *Journal of the American Dietetic Association* 2009;109:1886-95.

- 1  
2  
3  
4 9. Lindstrom J, Tuomilehto J. The diabetes risk score: a practical tool to predict type  
5  
6 2 diabetes risk. *Diabetes Care* 2003;26:725-31.  
7
- 8  
9 10. Wilson PW, Meigs JB, Sullivan L, Fox CS, Nathan DM, D'Agostino RB, Sr.  
10  
11 Prediction of incident diabetes mellitus in middle-aged adults: the Framingham  
12  
13 Offspring Study. *Archives of internal medicine* 2007;167:1068-74.  
14
- 15  
16 11. Collaboration NCDRF. Worldwide trends in body-mass index, underweight,  
17  
18 overweight, and obesity from 1975 to 2016: a pooled analysis of 2416  
19  
20 population-based measurement studies in 128.9 million children, adolescents, and  
21  
22 adults. *Lancet* 2017.  
23
- 24  
25 12. Global BMIMC. Body-mass index and all-cause mortality:  
26  
27 individual-participant-data meta-analysis of 239 prospective studies in four  
28  
29 continents. *Lancet* 2016;388:776-86.  
30  
31
- 32  
33 13. Lu JL, Molnar MZ, Naseer A, Mikkelsen MK, Kalantar-Zadeh K, Kovesdy CP.  
34  
35 Association of age and BMI with kidney function and mortality: a cohort study.  
36  
37 *The lancet Diabetes & endocrinology* 2015;3:704-14.  
38  
39
- 40  
41 14. Asia Pacific Cohort Studies C, Ni Mhurchu C, Parag V, Nakamura M, Patel A,  
42  
43 Rodgers A, et al. Body mass index and risk of diabetes mellitus in the Asia-Pacific  
44  
45 region. *Asia Pacific journal of clinical nutrition* 2006;15:127-33.  
46
- 47  
48 15. National Bureau of Statistics of China. *China statistical yearbook 2011*. Beijing:  
49  
50 China Statistics Press, 2011.  
51
- 52  
53 16. Chinese Medical Association Society of Endocrinology Group Obesity. Expert  
54  
55 consensus for Chinese adult obesity prevention and control. *Chin J Endocrinol*  
56  
57  
58  
59  
60

- 1  
2  
3 Metab 2011;27(9): 711-717.  
4  
5  
6 17. Geiss LS, Wang J, Cheng YJ, Thompson TJ, Barker L, Li Y, et al. Prevalence and  
7  
8 incidence trends for diagnosed diabetes among adults aged 20 to 79 years, United  
9  
10 States, 1980-2012. JAMA 2014;312:1218-26.  
11  
12  
13 18. National Diabetes Research Group. A mass survey of diabetes mellitus in a  
14  
15 population of 300,000 in 14 provinces and municipalities in China. Zhonghua nei  
16  
17 ke za zhi 1981;20:678-83.  
18  
19  
20 19. Pan XR, Yang WY, Li GW, Liu J. Prevalence of diabetes and its risk factors in  
21  
22 China, 1994. National Diabetes Prevention and Control Cooperative Group.  
23  
24 Diabetes Care 1997;20:1664-9.  
25  
26  
27 20. Yang W, Lu J, Weng J, Jia W, Ji L, Xiao J, et al. Prevalence of diabetes among  
28  
29 men and women in China. The New England journal of medicine  
30  
31 2010;362:1090-101.  
32  
33  
34 21. Xu Y, Wang L, He J, Bi Y, Li M, Wang T, et al. Prevalence and control of  
35  
36 diabetes in Chinese adults. JAMA 2013;310:948-59.  
37  
38  
39 22. Quan J, Li TK, Pang H, Choi CH, Siu SC, Tang SY, et al. Diabetes incidence and  
40  
41 prevalence in Hong Kong, China during 2006-2014. Diabetic medicine : a journal  
42  
43 of the British Diabetic Association 2017;34:902-8.  
44  
45  
46 23. Hartemink N, Boshuizen HC, Nagelkerke NJ, Jacobs MA, van Houwelingen HC.  
47  
48 Combining risk estimates from observational studies with different exposure  
49  
50 cutpoints: a meta-analysis on body mass index and diabetes type 2. American  
51  
52 journal of epidemiology 2006;163:1042-52.  
53  
54  
55  
56  
57  
58  
59  
60



- 1  
2  
3  
4 24. Wang D, Li Y, Lee SG, Wang L, Fan J, Zhang G, et al. Ethnic differences in body  
5  
6 composition and obesity related risk factors: study in Chinese and white males  
7  
8 living in China. *PloS one* 2011;6:e19835.  
9
- 10  
11 25. Khoo CM, Sairazi S, Taslim S, Gardner D, Wu Y, Lee J, et al. Ethnicity modifies  
12  
13 the relationships of insulin resistance, inflammation, and adiponectin with obesity  
14  
15 in a multiethnic Asian population. *Diabetes Care* 2011;34:1120-6.  
16
- 17  
18 26. Canning KL, Brown RE, Jamnik VK, Kuk JL. Relationship between obesity and  
19  
20 obesity-related morbidities weakens with aging. *The journals of gerontology*  
21  
22 *Series A, Biological sciences and medical sciences* 2014;69:87-92.  
23
- 24  
25 27. Asia Pacific Cohort Studies C, Ni Mhurchu C, Parag V, Nakamura M, Patel A,  
26  
27 Rodgers A, et al. Body mass index and risk of diabetes mellitus in the Asia-Pacific  
28  
29 region. *Asia Pacific journal of clinical nutrition* 2006;15:127-33.  
30  
31
- 32  
33 28. Lumeng CN, Saltiel AR. Inflammatory links between obesity and metabolic  
34  
35 disease. *The Journal of clinical investigation* 2011;121:2111-7.  
36
- 37  
38 29. Reinehr T, Karges B, Meissner T, Wiegand S, Stoffel-Wagner B, Holl RW, et al.  
39  
40 Inflammatory Markers in Obese Adolescents with Type 2 Diabetes and Their  
41  
42 Relationship to Hepatokines and Adipokines. *The Journal of pediatrics*  
43  
44 2016;173:131-5.  
45  
46
- 47  
48 30. Vrachnis N, Antonakopoulos N, Iliodromiti Z, Dafopoulos K, Siristatidis C,  
49  
50 Pappa KI, et al. Impact of maternal diabetes on epigenetic modifications leading  
51  
52 to diseases in the offspring. *Experimental diabetes research* 2012;2012:538474.  
53  
54
- 55  
56 31. Pettitt DJ, Lawrence JM, Beyer J, Hillier TA, Liese AD, Mayer-Davis B, et al.  
57  
58  
59  
60

- 1  
2  
3 Association between maternal diabetes in utero and age at offspring's diagnosis of  
4 type 2 diabetes. *Diabetes Care* 2008;31:2126-30..  
5  
6  
7  
8  
9 32. Dollman J, Norton K, Norton L. Evidence for secular trends in children's physical  
10 activity behaviour. *British journal of sports medicine* 2005;39:892-7; discussion 7.  
11  
12  
13 33. Gustat J, Srinivasan SR, Elkasabany A, Berenson GS. Relation of self-rated  
14 measures of physical activity to multiple risk factors of insulin resistance  
15 syndrome in young adults: the Bogalusa Heart Study. *Journal of clinical*  
16 *epidemiology* 2002;55:997-1006.  
17  
18  
19  
20  
21  
22  
23 34. Yeh HC, Duncan BB, Schmidt MI, Wang NY, Brancati FL. Smoking, smoking  
24 cessation, and risk for type 2 diabetes mellitus: a cohort study. *Annals of internal*  
25 *medicine* 2010;152:10-7.  
26  
27  
28  
29  
30 35. Malecka-Tendera E, Erhardt E, Molnar D. Type 2 diabetes mellitus in European  
31 children and adolescents. *Acta paediatrica* 2005;94:543-6.  
32  
33  
34  
35 36. World Health Organization. Prevention of diabetes mellitus.  
36  
37 [http://whqlibdoc.who.int/trs/WHO\\_TRS\\_844.pdf](http://whqlibdoc.who.int/trs/WHO_TRS_844.pdf). Accessed December 28, 2012.  
38  
39  
40  
41  
42  
43  
44  
45  
46  
47  
48  
49  
50  
51  
52  
53  
54  
55  
56  
57  
58  
59  
60

1  
2  
3  
4  
5  
6  
7  
8  
9  
10  
11  
12  
13  
14  
15  
16  
17  
18  
19  
20  
21  
22  
23  
24  
25  
26  
27  
28  
29  
30  
31  
32  
33  
34  
35  
36  
37  
38  
39  
40  
41  
42  
43  
44  
45  
46  
47

Table 1  
Baseline characteristics of participants free of diabetes according to age groups

|                                | Age group, y      |                   |                   |                   |                   |                   | P for trend |
|--------------------------------|-------------------|-------------------|-------------------|-------------------|-------------------|-------------------|-------------|
|                                | 20 to <30         | 30 to <40         | 40 to <50         | 50 to <60         | 60 to <70         | ≥70               |             |
| <b>Male</b>                    |                   |                   |                   |                   |                   |                   |             |
| Participants, n                | 15833             | 45049             | 23729             | 17460             | 9673              | 4379              |             |
| BMI, kg/m <sup>2</sup>         | 23.0 (3.6)        | 24.1 (3.4)        | 24.6 (3.0)        | 24.7 (2.9)        | 24.7 (2.9)        | 24.2 (3.1)        | < 0.0001    |
| Current smoker, %              | 19.3              | 21.7              | 37.7              | 53.9              | 43.2              | 23.6              | < 0.0001    |
| Current drinker, %             | 1.0               | 1.7               | 4.8               | 6.7               | 6.8               | 3.1               | < 0.0001    |
| Fasting plasma glucose, mmol/L | 4.86 (0.51)       | 4.86 (0.59)       | 4.99 (0.63)       | 5.14 (0.67)       | 5.21 (0.68)       | 5.26 (0.68)       | < 0.0001    |
| Systolic blood pressure, mmHg  | 122 (13)          | 120 (13)          | 121 (15)          | 125 (17)          | 130 (18)          | 139 (19)          | < 0.0001    |
| Diastolic blood pressure, mmHg | 73 (9)            | 75 (10)           | 78 (11)           | 80 (11)           | 80 (11)           | 79 (11)           | < 0.0001    |
| Total cholesterol, mmol/L      | 4.32 (0.81)       | 4.64 (0.86)       | 4.87 (0.88)       | 4.95 (0.89)       | 4.95 (0.89)       | 4.89 (0.88)       | < 0.0001    |
| Triglyceride, mmol/L           | 0.99 (0.70, 1.40) | 1.22 (0.86, 1.80) | 1.45 (1.00, 2.15) | 1.50 (1.02, 2.19) | 1.40 (1.00, 2.00) | 1.27 (0.92, 1.78) | < 0.0001    |
| LDL-C, mmol/L                  | 2.55 (0.60)       | 2.72 (0.66)       | 2.85 (0.67)       | 2.89 (0.68)       | 2.90 (0.69)       | 2.84 (0.66)       | < 0.0001    |
| HDL-C, mmol/L                  | 1.32 (0.24)       | 1.28 (0.27)       | 1.28 (0.28)       | 1.29 (0.30)       | 1.29 (0.29)       | 1.32 (0.29)       | 0.11        |
| Family history of diabetes, %  | 0.61              | 1.59              | 2.14              | 1.43              | 0.65              | 0.14              | 0.01        |
| <b>Female</b>                  |                   |                   |                   |                   |                   |                   |             |
| Participants, n                | 12800             | 37927             | 21685             | 12546             | 7861              | 2891              |             |
| BMI, kg/m <sup>2</sup>         | 20.6 (2.7)        | 21.4 (2.9)        | 22.5 (2.9)        | 23.4 (2.9)        | 23.8 (3.1)        | 24.0 (3.4)        | < 0.0001    |
| Current smoker, %              | 0.12              | 0.13              | 0.14              | 0.04              | 0.32              | 0.15              | 0.43        |
| Current drinker, %             | 0.12              | 0.11              | 0.20              | 0.13              | 0.13              | 0.15              | 0.70        |
| Fasting plasma glucose, mmol/L | 4.73 (0.50)       | 4.74 (0.55)       | 4.86 (0.57)       | 5.00 (0.61)       | 5.12 (0.63)       | 5.19 (0.69)       | < 0.0001    |
| Systolic blood pressure, mmHg  | 110 (12)          | 109 (12)          | 113 (15)          | 122 (17)          | 130 (18)          | 141 (20)          | < 0.0001    |
| Diastolic blood pressure, mmHg | 69 (9)            | 69 (9)            | 71 (10)           | 76 (11)           | 77 (11)           | 77 (12)           | < 0.0001    |

|                               |                   |                   |                   |                   |                   |                   |          |
|-------------------------------|-------------------|-------------------|-------------------|-------------------|-------------------|-------------------|----------|
| Total cholesterol, mmol/L     | 4.34 (0.78)       | 4.44 (0.79)       | 4.64 (0.81)       | 5.14 (0.93)       | 5.46 (0.94)       | 5.50 (0.96)       | < 0.0001 |
| Triglyceride, mmol/L          | 0.71 (0.55, 0.95) | 0.78 (0.59, 1.06) | 0.86 (0.63, 1.20) | 1.10 (0.80, 1.58) | 1.36 (1.00, 1.92) | 1.47 (1.09, 2.02) | < 0.0001 |
| LDL-C, mmol/L                 | 2.47 (0.59)       | 2.54 (0.60)       | 2.69 (0.62)       | 3.03 (0.71)       | 3.21 (0.74)       | 3.20 (0.73)       | < 0.0001 |
| HDL-C, mmol/L                 | 1.51 (0.30)       | 1.46 (0.31)       | 1.46 (0.30)       | 1.47 (0.32)       | 1.47 (0.32)       | 1.48 (0.32)       | 0.05     |
| Family history of diabetes, % | 1.72              | 2.82              | 4.08              | 3.00              | 1.77              | 0.62              | 0.45     |

Data are mean (SD), or median (IQR), or proportions.

1  
2  
3  
4  
5  
6  
7  
8  
9  
10  
11  
12  
13  
14  
15  
16  
17  
18  
19  
20  
21  
22  
23  
24  
25  
26  
27  
28  
29  
30  
31  
32  
33  
34  
35  
36  
37  
38  
39  
40  
41  
42  
43  
44  
45  
46  
47

Table 2  
Association between age and body mass index with risk of incident diabetes in Chinese adults

|                                    | N0. of participants | N0. of events | Incidence rate<br>(per 1000 persons per year) | Hazard Ratios                |                                             |
|------------------------------------|---------------------|---------------|-----------------------------------------------|------------------------------|---------------------------------------------|
| Age, y                             |                     |               |                                               | Body mass index<br>-adjusted | Multivariable-adjusted<br>+ body mass index |
| 20 to <30                          | 28633               | 75            | 0.93                                          | Ref.                         | Ref.                                        |
| 30 to <40                          | 82976               | 546           | 2.18                                          | 1.64 (1.29, 2.09)            | 2.07 (1.24, 3.47)                           |
| 40 to <50                          | 45414               | 789           | 5.45                                          | 3.83 (3.03, 4.86)            | 4.83 (2.90, 8.03)                           |
| 50 to <60                          | 30006               | 1224          | 12.50                                         | 8.39 (6.64, 10.59)           | 12.26 (7.42, 20.27)                         |
| 60 to <70                          | 17534               | 976           | 17.61                                         | 11.77 (9.30, 14.89)          | 15.50 (9.34, 25.70)                         |
| ≥70                                | 7270                | 564           | 22.39                                         | 17.55 (13.79, 22.33)         | 21.98 (13.14, 36.77)                        |
| P for trend                        | -                   | -             | -                                             | < 0.0001                     | < 0.0001                                    |
| Crude rate                         | 211833              | 4174          | 6.17                                          | -                            | -                                           |
| Standardized rate <sup>†</sup>     | 211833              | 4174          | 7.35                                          | -                            | -                                           |
| Body mass index, kg/m <sup>2</sup> |                     |               |                                               | Age-adjusted                 | Multivariable-adjusted                      |
| <18.5                              | 12081               | 31            | 0.82                                          | 0.39 (0.27, 0.56)            | 0.46 (0.24, 0.90)                           |
| 18.5-<24.0                         | 116812              | 1073          | 2.72                                          | Ref.                         | Ref.                                        |
| 24.0-<28.0                         | 64774               | 1936          | 9.44                                          | 2.51 (2.33, 2.70)            | 2.36 (2.04, 2.73)                           |
| ≥28.0                              | 18166               | 1134          | 21.00                                         | 5.58 (5.13, 6.07)            | 5.22 (4.44, 6.13)                           |
| P for trend                        |                     |               |                                               | < 0.0001                     | < 0.0001                                    |

<sup>†</sup>The incidence rate was standardized to the population of mainland China in 2010.  
Multivariable-adjusted model adjusted for age, sex, smoking status, drinking status, family history of diabetes.

Table 3  
Association of per kg/m<sup>2</sup> increase of body mass index and incident diabetes, by baseline age group

| Age, y                 | HR                |                        |
|------------------------|-------------------|------------------------|
|                        | Sex-adjusted      | Multivariable-adjusted |
| 20 to <30              | 1.35 (1.29, 1.40) | 1.39 (1.27, 1.52)      |
| 30 to <40              | 1.31 (1.29, 1.33) | 1.30 (1.26, 1.34)      |
| 40 to <50              | 1.27 (1.25, 1.29) | 1.27 (1.23, 1.32)      |
| 50 to <60              | 1.18 (1.17, 1.20) | 1.17 (1.13, 1.21)      |
| 60 to <70              | 1.13 (1.11, 1.15) | 1.14 (1.10, 1.19)      |
| ≥70                    | 1.11 (1.08, 1.14) | 1.12 (1.07, 1.17)      |
| Age × BMI interaction, | < 0.0001          | < 0.0001               |
| P                      |                   |                        |

Multivariable-adjusted model adjusted for sex, smoking status, drinking status, family history of diabetes.

**Figure legends**

Figure 1. Association of body mass index with risk of incident diabetes, by baseline age group. A BMI of 18.5 to 23.9 kg/m<sup>2</sup> was defined as the referent category.

For peer review only

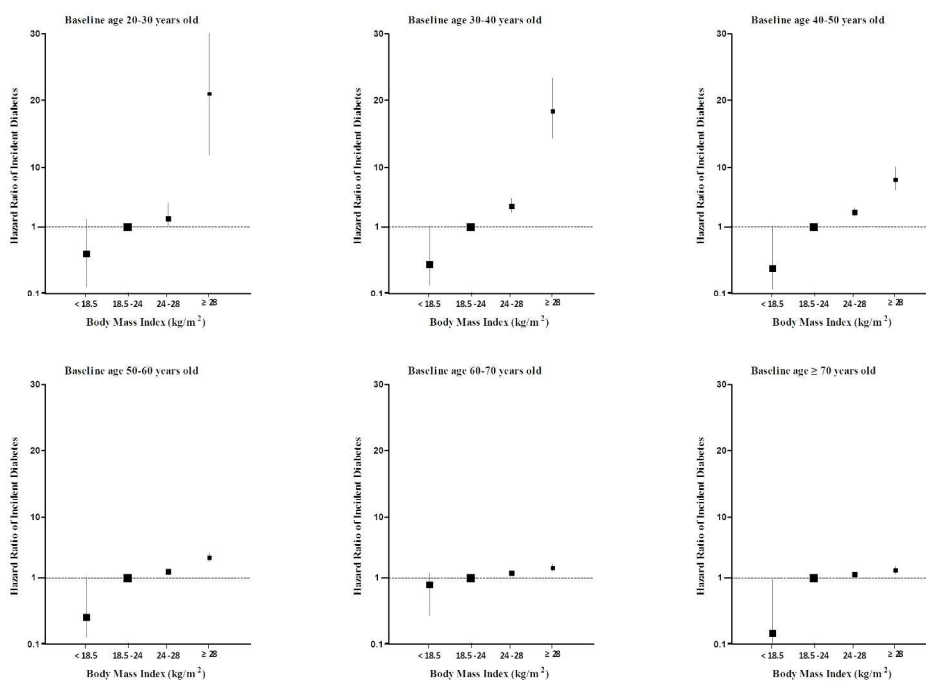

Figure 1. Association of body mass index with risk of incident diabetes, by baseline age group. A BMI of 18.5 to 23.9 kg/m<sup>2</sup> was defined as the referent category.

266x189mm (300 x 300 DPI)



## Supplemental table 1

Sex-adjusted HRs of incident diabetes with increasing body mass index, by baseline age groups.

|           | Body mass index, kg/m <sup>2</sup> |            |                   |                      |
|-----------|------------------------------------|------------|-------------------|----------------------|
|           | <18.5                              | 18.5-<24.0 | 24.0-<28.0        | ≥28                  |
| Age, y    |                                    |            |                   |                      |
| 20 to <30 | 0.64 (0.19, 2.15)                  | Ref.       | 2.22 (1.08, 4.57) | 21.01 (11.92, 37.04) |
| 30 to <40 | 0.50 (0.22, 1.14)                  | Ref.       | 4.10 (3.19, 5.28) | 18.35 (14.36, 23.44) |
| 40 to <50 | 0.44 (0.16, 1.19)                  | Ref.       | 3.19 (2.64, 3.86) | 8.21 (6.68, 10.08)   |
| 50 to <60 | 0.46 (0.19, 1.11)                  | Ref.       | 1.92 (1.67, 2.20) | 4.00 (3.41, 4.69)    |
| 60 to <70 | 0.91 (0.49, 1.72)                  | Ref.       | 1.71 (1.47, 1.98) | 2.48 (2.06, 2.99)    |
| ≥70       | 0.24 (0.08, 0.76)                  | Ref.       | 1.53 (1.27, 1.84) | 2.12 (1.67, 2.68)    |

## Supplemental table 2

Interaction of BMI × smoking status and age × family history of diabetes on the risk of incident diabetes.

|                                                 | HR               |                        |
|-------------------------------------------------|------------------|------------------------|
|                                                 | Unadjusted       | Multivariable-adjusted |
| Risk of per increase of BMI                     |                  |                        |
| Current smoker                                  | 1.84 (1.69-2.00) | 1.97 (1.80-2.15)       |
| Non-smoker                                      | 2.16 (1.76-2.64) | 2.34 (1.86-2.93)       |
| BMI × smoking status interaction, P             | 0.10             | 0.25                   |
| Risk of family history of diabetes              |                  |                        |
| Total                                           | 1.98 (1.70-2.31) | 1.68 (1.38-2.03)       |
| 20 to <30                                       | 2.13 (0.52-8.67) | 4.38 (0.82-23.39)      |
| 30 to <40                                       | 3.06 (2.23-4.21) | 2.81 (1.86-4.24)       |
| 40 to <50                                       | 2.10 (1.59-2.79) | 1.81 (1.25-2.64)       |
| 50 to <60                                       | 1.90 (1.43-2.52) | 1.80 (1.27-2.56)       |
| 60 to <70                                       | 2.04 (1.36-3.06) | 1.44 (0.85-2.42)       |
| ≥70                                             | 1.35 (0.43-4.20) | 0.78 (0.19-3.22)       |
| Age × family history of diabetes interaction, P | 0.45             | 0.71                   |

Multivariable-adjusted model adjusted for age, sex, smoking status, drinking status, family history of diabetes, except the strata variable.

## Checklist of items

|                           | Item No | Page number |
|---------------------------|---------|-------------|
| <b>Title and abstract</b> | 1       | 1-4         |
| <b>Introduction</b>       |         |             |
| Background/rationale      | 2       | 6-7         |
| Objectives                | 3       | 7           |
| <b>Methods</b>            |         |             |
| Study design              | 4       | 8           |
| Setting                   | 5       | 8           |
| Participants              | 6       | 8           |
| Variables                 | 7       | 9           |
| Data sources/ measurement | 8*      | 8-9         |
| Bias                      | 9       | 8           |
| Study size                | 10      | 8           |
| Quantitative variables    | 11      | 9           |
| Statistical methods       | 12      | 9-11        |
| <b>Results</b>            |         |             |
| Participants              | 13*     | 12          |
| Descriptive data          | 14*     | 12          |
| Outcome data              | 15*     | 12          |
| Main results              | 16      | 12-13       |
| Other analyses            | 17      | 13-14       |
| <b>Discussion</b>         |         |             |
| Key results               | 18      | 15-19       |
| Limitations               | 19      | 19          |
| Interpretation            | 20      | 19          |
| Generalisability          | 21      | 19          |
| <b>Other information</b>  |         |             |
| Funding                   | 22      | 2           |

# BMJ Open

## Association of body mass index and age with incident diabetes in Chinese adults: a population-based cohort study

|                                 |                                                                                                                                                                                                                                                                                                                                                                                                                                                                                                                                                                                                                                                                                                                                                                                                                                                                                                                                                                                                                                                                                                                                                                                                                                                                                                                                                                       |
|---------------------------------|-----------------------------------------------------------------------------------------------------------------------------------------------------------------------------------------------------------------------------------------------------------------------------------------------------------------------------------------------------------------------------------------------------------------------------------------------------------------------------------------------------------------------------------------------------------------------------------------------------------------------------------------------------------------------------------------------------------------------------------------------------------------------------------------------------------------------------------------------------------------------------------------------------------------------------------------------------------------------------------------------------------------------------------------------------------------------------------------------------------------------------------------------------------------------------------------------------------------------------------------------------------------------------------------------------------------------------------------------------------------------|
| Journal:                        | <i>BMJ Open</i>                                                                                                                                                                                                                                                                                                                                                                                                                                                                                                                                                                                                                                                                                                                                                                                                                                                                                                                                                                                                                                                                                                                                                                                                                                                                                                                                                       |
| Manuscript ID                   | bmjopen-2018-021768.R1                                                                                                                                                                                                                                                                                                                                                                                                                                                                                                                                                                                                                                                                                                                                                                                                                                                                                                                                                                                                                                                                                                                                                                                                                                                                                                                                                |
| Article Type:                   | Research                                                                                                                                                                                                                                                                                                                                                                                                                                                                                                                                                                                                                                                                                                                                                                                                                                                                                                                                                                                                                                                                                                                                                                                                                                                                                                                                                              |
| Date Submitted by the Author:   | 03-May-2018                                                                                                                                                                                                                                                                                                                                                                                                                                                                                                                                                                                                                                                                                                                                                                                                                                                                                                                                                                                                                                                                                                                                                                                                                                                                                                                                                           |
| Complete List of Authors:       | Chen, Ying; Department of Endocrinology and Metabolism, Affiliated Hospital of Nantong University<br>Zhang, Xiaoping; Department of health examination, Rich Healthcare Group<br>Yuan, Jie; Affiliated Hospital of Nantong University, Department of Endocrinology and Metabolism<br>Cai, Bo; Nantong Center for Chronic and Noncommunicable Disease Control and Prevention, Center for Disease Control and Prevention<br>Wang, Xiaoli; Department of health examination, Rich Healthcare Group<br>Wu, Xiaoli; Department of health examination, Rich Healthcare Group<br>Zhang, Yuehua; Department of health examination, Rich Healthcare Group<br>Zhang, Xiaoyi; Affiliated Hospital of Nantong University, Department of Endocrinology & Metabolism<br>Yin, Tong; Department of Endocrinology and Metabolism, Affiliated Hospital of Nantong University<br>Zhu, Xiaohui; Affiliated Hospital of Nantong University, Department of Endocrinology & Metabolism<br>Gu, Yunjuan; Affiliated Hospital of Nantong University, Department of Endocrinology & Metabolism<br>Li, Xiaoying; Department of Endocrinology and Metabolism, Zhongshan Hospital, Fudan University<br>Wang, Zhiwei; Affiliated Hospital of Nantong University, Department of General Surgery<br>Cui, Shiwei; Affiliated Hospital of Nantong University, Department of Endocrinology and Metabolism |
| <b>Primary Subject Heading</b>: | Diabetes and endocrinology                                                                                                                                                                                                                                                                                                                                                                                                                                                                                                                                                                                                                                                                                                                                                                                                                                                                                                                                                                                                                                                                                                                                                                                                                                                                                                                                            |
| Secondary Subject Heading:      | Diabetes and endocrinology, Epidemiology                                                                                                                                                                                                                                                                                                                                                                                                                                                                                                                                                                                                                                                                                                                                                                                                                                                                                                                                                                                                                                                                                                                                                                                                                                                                                                                              |
| Keywords:                       | type 2 diabetes, body mass index, young onset diabetes, aging                                                                                                                                                                                                                                                                                                                                                                                                                                                                                                                                                                                                                                                                                                                                                                                                                                                                                                                                                                                                                                                                                                                                                                                                                                                                                                         |
|                                 |                                                                                                                                                                                                                                                                                                                                                                                                                                                                                                                                                                                                                                                                                                                                                                                                                                                                                                                                                                                                                                                                                                                                                                                                                                                                                                                                                                       |

SCHOLARONE™  
Manuscripts

1  
2  
3  
4 **Association of body mass index and age with incident diabetes in Chinese adults:**  
5  
6 **a population-based cohort study**  
7

8 Ying Chen<sup>a\*</sup>, Xiao-Ping Zhang<sup>b\*</sup>, Jie Yuan<sup>a\*</sup>, Bo Cai<sup>c</sup>, Xiao-Li Wang<sup>b</sup>, Xiao-Li Wu<sup>b</sup>,  
9  
10 Yue-Hua Zhang<sup>b</sup>, Xiao-Yi Zhang<sup>a</sup>, Tong Yin<sup>a</sup>, Xiao-Hui Zhu<sup>a</sup>, Yun-Juan Gu<sup>a</sup>, Xiao-  
11  
12 Ying Li<sup>c§</sup>, Zhi-Wei Wang<sup>d§</sup>, Shi-Wei Cui<sup>a§</sup>  
13  
14

- 15  
16 a. Department of Endocrinology and Metabolism, Affiliated Hospital of Nantong  
17  
18 University, Nantong, Jiangsu, China  
19  
20 b. Department of health examination, Rich Healthcare Group, China  
21  
22  
23 c. Department of Endocrinology and Metabolism, Zhongshan Hospital, Fudan  
24  
25 University, Shanghai, China  
26  
27  
28 d. Department of General Surgery, Affiliated Hospital of Nantong University,  
29  
30 Nantong, Jiangsu, China  
31  
32  
33 e. Nantong Center for Chronic and Noncommunicable Disease Control and  
34  
35 Prevention, Center for Disease Control and Prevention, Nantong, Jiangsu, China  
36  
37  
38  
39

40 \* Ying Chen, Xiao-Ping Zhang and Jie Yuan contributed equally to this paper.  
41

42 § Shi-Wei Cui, Zhi-Wei Wang and Xiao-Ying Li contributed equally to this paper.  
43

44  
45 §Correspondence to Xiao-Ying Li (Email address: [lixu@sibs.ac.cn](mailto:lixu@sibs.ac.cn)) or Shi-Wei Cui  
46  
47 (Email address: [shiweicui911@126.com](mailto:shiweicui911@126.com))  
48  
49

50 **Running head:** Effect of BMI and age on incident diabetes  
51

52 **Key terms:** type 2 diabetes, body mass index, age, young-onset diabetes  
53

54 **Conflict of interest:**  
55  
56  
57  
58  
59  
60

1  
2  
3 The authors declare no conflicts of interest.  
4

5  
6 **Financial support:**  
7

8 The authors thank the field investigators for their contribution and the participants for  
9 their cooperation. This work is supported by grants from the National Key Research  
10 and Development Program of China (No.2016YFC1304801), the Natural Science  
11 Foundation of Nantong (HS2014036), Science and technology project of Nantong  
12 City (MS32016021).  
13  
14  
15  
16  
17  
18  
19

20  
21 **Authors' contributions:**

22 YC, XZ, JY, SC, ZW and XL participated in study concept and design. YC, XZ, XW,  
23 XW, and YZ did the data collection. YC, JY, BC, TY, XZ, YG participated in the  
24 analysis and interpretation of the data, and drafted the manuscript. XL, SC, ZW and  
25 YC revised the manuscript and approved the final version of the manuscript. All  
26 authors approved the final version of the manuscript.  
27  
28

29  
30 **Data sharing statement:**

31 Extra data can be accessed via the Dryad data repository at <http://datadryad.org/> with  
32 the doi: 10.5061/dryad.ft8750v  
33  
34  
35

36  
37 **Abstract**

38  
39 **Objective.** Type 2 diabetes mellitus is increasing in young adults, and greater  
40 adiposity is considered a major risk factor. However, whether there is an association  
41 between obesity and diabetes and how this might be impacted by age is not clear.  
42  
43 Therefore, we investigated the association between body mass index (BMI) and  
44 diabetes across a wide range of age groups (20-30, 30-40, 40-50, 50-60, 60-70,  $\geq 70$   
45 years old).  
46  
47  
48  
49  
50  
51

52  
53 **Design.** We performed a retrospective cohort study using healthy screening program  
54 data.  
55  
56  
57  
58  
59

1  
2  
3  
4 **Setting.** A total of 211,833 adult Chinese persons > 20-years-old across 32 sites and  
5  
6 11 cities in China (Shanghai, Beijing, Nanjing, Suzhou, Shenzhen, Changzhou,  
7  
8 Chengdu, Guangzhou, Hefei, Wuhan, Nantong) were selected for the study; these  
9  
10 persons were free of diabetes at baseline.  
11

12  
13 **Primary and secondary outcome measures.** Fasting plasma glucose levels were  
14  
15 measured and information regarding the history of diabetes was collected at each  
16  
17 visit. Diabetes was diagnosed as fasting plasma glucose  $\geq 7.00$  mmol/L and/or self-  
18  
19 reported diabetes. Patients were censored at the date of diagnosis or the final visit,  
20  
21 whichever came first.  
22  
23

24  
25 **Results.** With a median follow-up of 3.1 years, 4,174 of the 211,833 participants  
26  
27 developed diabetes, with an age-adjusted incidence rate of 7.35 per 1,000 persons.  
28  
29 The risk of incident diabetes increased proportionally with increasing baseline BMI  
30  
31 values, with a 23% increased risk of incident diabetes with each  $\text{kg/m}^2$  increase in  
32  
33 BMI (95%CI: 1.22, 1.24). Across all age groups, there was a linear association  
34  
35 between BMI and the risk of incident diabetes, although there was a stronger  
36  
37 association between BMI and incident diabetes in the younger age groups (age  $\times$  BMI  
38  
39 interaction,  $P < 0.0001$ ).  
40  
41  
42  
43

44  
45 **Conclusions.** An increased BMI is also independently associated with a higher risk of  
46  
47 developing diabetes in young adults and the effects of BMI on incident diabetes were  
48  
49 accentuated in younger adults.  
50

51  
52 **Key terms:** type 2 diabetes, body mass index, age, young-onset diabetes  
53  
54  
55  
56  
57  
58  
59  
60

1  
2  
3 Strengths and limitations of this study:  
4

- 5
- 6 1. The large sample size allows analysis of the interaction of age and BMI on  
7  
8 incident diabetes.  
9
  - 10 2. Our study was comprised of young, middle, and old-aged apparently healthy  
11  
12 adults, while participants in many other cohorts tended to be older.  
13
  - 14 3. The data was collected under standardized conditions and followed according to  
15  
16 uniform procedures by trained staff. Laboratory methods also were carefully  
17  
18 standardized with rigorous internal and external quality controls.  
19  
20
  - 21 4. We only measured body weight and height at baseline, which could not address  
22  
23 fat distribution and weigh change.  
24  
25  
26  
27  
28  
29  
30  
31  
32  
33  
34  
35  
36  
37  
38  
39  
40  
41  
42  
43  
44  
45  
46  
47  
48  
49  
50  
51  
52  
53  
54  
55  
56  
57  
58  
59  
60



1  
2  
3  
4 Type 2 diabetes is global epidemic. The International Diabetes Foundation (IDF)  
5  
6 estimates that about 415 million people worldwide had type 2 diabetes mellitus in  
7  
8 2015. This number is expected to rise to 642 million by 2040, with 140.2 million of  
9  
10 the affected people living in Asia [1]. Although diabetes has traditionally been  
11  
12 thought of as a disease that affects elderly people, the prevalence of type 2 diabetes in  
13  
14 young adults is increasing. National surveys in China report that 7.09% of the  
15  
16 individuals that had developed diabetes were younger than 40 years in 2011, while  
17  
18 this percentage was less than 1% two decades ago [2]. Younger diabetic patients tend  
19  
20 to have a poorer prognosis, associated with an increased risk of cardiovascular disease  
21  
22 and microvascular complications [3, 4]. The reasons for the declining age at the onset  
23  
24 of type 2 diabetes are poorly understood and complicated. However, it has been  
25  
26 speculated that the increasing prevalence of obesity in younger individuals may  
27  
28 contribute to the epidemic of diabetes in young people [5].  
29  
30  
31  
32  
33  
34  
35

36 Greater adiposity is a major risk factor for the development of type 2 diabetes. A  
37  
38 meta-analysis combining 18 prospective cohort studies reported that the relative risk  
39  
40 (RR) of diabetes for obese persons compared to those with normal weight was 7.19  
41  
42 (95% CI: 5.74, 9.00) and compared to overweight individuals was 2.99 (95% CI:  
43  
44 2.42, 3.72) [6]. Obesity and diabetes are so interconnected that the term “diabesity”  
45  
46 has been coined [7]. However, there also seems to be an important relationship with  
47  
48 age [8, 9]. Younger age itself is a protective factor for incident diabetes; for every 10  
49  
50 years younger a person is, the risk of developing diabetes decreases by 50%-70%  
51  
52 [10]. However, the increasing prevalence of obesity in young individuals seems to  
53  
54  
55  
56  
57  
58  
59  
60

1  
2  
3  
4 weaken the protective effects of age, in regards to diabetes incidence. The NCD Risk  
5  
6 Factor Collaboration pooled 128·9 million children, adolescents, and adults to assess  
7  
8 worldwide trends in body-mass index, looking at underweight, overweight, and obese  
9  
10 individuals from 1975 to 2016 and found that the mean BMI and obesity prevalence  
11  
12 in adolescents and young adults has risen in past decades, and the trend is still  
13  
14 continuing [11]. However, the relationship between age, BMI, and diabetes incidence  
15  
16 remains unclear. The risk of mortality per unit increase in BMI is greater in younger  
17  
18 than in older people [12]. However, the effect of age on the association between BMI  
19  
20 and kidney disease is the opposite [13]. The heterogeneity of the association between  
21  
22 diabetes and age has been seldom explored. The Asia Pacific Cohort Studies  
23  
24 Collaboration pooled twenty-seven cohorts from Asia, New Zealand, and Australia  
25  
26 found that the association between BMI and the risk of diabetes was stronger in  
27  
28 participants under 60 compared with individuals between 60-69 years of age, while  
29  
30 the association was lowest in patients > 70-years-old [14]. However, these  
31  
32 conclusions were based on an older population where most adults were older than 40-  
33  
34 years-old. Whether these findings can be extrapolated to younger adults is unclear,  
35  
36 despite the increasing risk of type 2 diabetes in younger individuals. Therefore, in the  
37  
38 present study, we investigated the association between BMI and the risk of incident  
39  
40 diabetes in a large retrospective cohort of individuals ranging from 20 to 99-years-old.  
41  
42  
43  
44  
45  
46  
47  
48  
49  
50  
51  
52  
53  
54  
55  
56  
57  
58  
59  
60

## METHODS

### Study design and participants

Data were extracted from a computerized database established by the Rich Healthcare Group in China, which includes all medical records for participants who received a health check from 2010 to 2016. The present analysis initially included all study participants that were at least 20-years-old with at least two visits between 2010 and 2016 (n=685,277). Participants were excluded at baseline if they had no available weight and height measurements (n=103,946), no available information on gender (n=1), extreme BMI values ( $<15 \text{ kg/m}^2$  or  $>55 \text{ kg/m}^2$ ) (n=152), or no available fasting plasma glucose value (n=31,370). We further excluded participants with visit intervals less than 2 years (n=324,233), participants diagnosed with diabetes at baseline (2,997 participants diagnosed by self-report and 4,115 diagnosed by a fasting plasma glucose  $\geq 7.0 \text{ mmol/L}$ ), and participants with undefined diabetes status at follow up (n=6,630). Finally, a total of 211,833 participants (116,123 male and 95,710 female) were included in the analysis. Cohort entry was defined as the date of the initial visit. Compared with individuals excluded from the present analyses, those included in the analyses were with similar age (42.1 vs 41.9 years old) and similar BMI (23.2 vs 23.3  $\text{kg/m}^2$ ), and with a relatively higher proportion of males (54.8 vs 52.1%).

This study was approved by the Rich Healthcare Group Review Board, and the information was retrieved retrospectively.

In each visit to the health check center, participants were requested to complete a

1  
2  
3 detailed questionnaire assessing demographic, lifestyle, medical history, and family  
4  
5 history of chronic disease. Height, weight, and blood pressure were measured by  
6  
7 trained staff. Body weight was measured in light clothing with no shoes to the nearest  
8  
9 0.1 kg. Height was measured to the nearest 0.1 cm. Body mass index was derived  
10  
11 from weight in kilograms divided by height in meters squared. Blood pressure was  
12  
13 measured by standard mercury sphygmomanometers.  
14  
15  
16  
17

18 Fasting venous blood samples were collected after at least a 10-h fast at each  
19  
20 visit. Serum triglyceride (TG), total cholesterol (TC), low density lipoprotein  
21  
22 cholesterol (LDL-C), and high density lipoprotein cholesterol (HDL-C), were  
23  
24 measured on an autoanalyser (Beckman 5800). Plasma glucose levels were measured  
25  
26 by the glucose oxidase method on an autoanalyser (Beckman 5800).  
27  
28  
29  
30  
31  
32

### 33 **Ascertainment of incident diabetes**

34  
35 Diagnosis of incident diabetes was defined as fasting plasma glucose of  $\geq 7.00$   
36  
37 mmol/L and/or self-reported diabetes during the follow-up period. Patients were  
38  
39 censored at the date of diagnosis of diabetes or the final visit, whichever came first.  
40  
41  
42  
43  
44

### 45 **Statistical analysis**

46  
47 Statistical analyses were performed on SAS 9.3 (SAS Institute, Cary, NC). A two-  
48  
49 sided *P* value less than 0.05 was considered statistically significant. Data from  
50  
51 descriptive analyses were reported as mean (SD), or median (IQR), or proportions.  
52  
53  
54 Participants were stratified into six baseline age groups with 10-year increments  
55  
56  
57  
58  
59  
60

1  
2  
3 starting from 20-30-years-old to over 70-years-old. Linear regression models were  
4 performed to assess the relationship between BMI, metabolic parameters, lifestyles,  
5 and family history of diabetes with age. Diabetes incidence was calculated in each and  
6 in the total of all age groups, and age-standardized diabetes incidence was adjusted to  
7 the Chinese population in 2010 [15].  
8  
9  
10  
11  
12  
13  
14

15  
16 Cox proportional hazard regression models were performed to estimate BMI-  
17 adjusted and multivariable-adjusted hazard ratios (95% confidence intervals) of age  
18 with incident diabetes and age-adjusted and multivariable-adjusted hazard ratios (95%  
19 confidence intervals) of BMI with incident diabetes. Analyses of BMI used  
20 predefined standard categories according to the Chinese criteria of obesity [16]:  
21 underweight ( $<18.5\text{kg/m}^2$ ), normal weight ( $18.5\text{-}<24.0\text{ kg/m}^2$ ), overweight ( $24.0\text{-}$   
22  $<28.0\text{ kg/m}^2$ ), and obese ( $\geq 28.0\text{ kg/m}^2$ ). The normal BMI group ( $18.5\text{-}<24.0\text{ kg/m}^2$ )  
23 was chosen as the referent category. Covariates in the multivariable models included  
24 age, sex, smoking status, drinking status, and family history of diabetes. The  
25 association between BMI and incident diabetes, as influenced by age, was further  
26 investigated. Hazard ratios (HRs) of incident diabetes were calculated respectively in  
27 each age group by Cox proportional hazard regression models with a BMI of  $18.5\text{-}$   
28  $<24.0\text{ kg/m}^2$  as the reference category. Since the association between BMI and  
29 incident diabetes were approximately linear, the HRs and corresponding 95% CI for  
30 incident diabetes across all age groups were estimated for per  $\text{kg/m}^2$  increase in BMI  
31 value. The modification effect was assessed for the interaction of age and BMI in the  
32 Cox model.  
33  
34  
35  
36  
37  
38  
39  
40  
41  
42  
43  
44  
45  
46  
47  
48  
49  
50  
51  
52  
53  
54  
55  
56  
57  
58  
59  
60

1  
2  
3  
4 In consideration of the baseline, confounding factors including smoking status,  
5  
6 and family history of diabetes, related to diabetes in young adults, subgroup analyses  
7  
8 were further performed respective to the HR of smoking status and family history of  
9  
10 diabetes, in regards to the overall risk of diabetes. The interaction of BMI\*current  
11  
12 smoker, age\*family history of diabetes was assessed in the Cox model.  
13  
14

### 15 **Patient and Public involvement**

16  
17  
18 Given the retrospective nature of the study, no patients were involved in any aspect of  
19  
20 the study.  
21  
22  
23  
24  
25  
26  
27  
28  
29  
30  
31  
32  
33  
34  
35  
36  
37  
38  
39  
40  
41  
42  
43  
44  
45  
46  
47  
48  
49  
50  
51  
52  
53  
54  
55  
56  
57  
58  
59  
60

## RESULTS

211,833 participants (116,123 male and 95,710 female) without diabetes at baseline were recruited. The mean age was 42.1-years-old (SD 12.6), ranging from 20 to 99-years-old. The mean BMI value was 23.2 kg/m<sup>2</sup> (SD 3.3). Baseline clinical and biochemical characteristics of participants were stratified by age and sex, BMI and sex, are presented in Table 1 and Supplementary Table 1. Total serum cholesterol, triglyceride, LDL-C, fasting plasma glucose, systolic blood pressure, and diastolic blood pressure gradually increased with age and BMI in both men and women.

During a median of 3.1 year follow-up (660,191 person-years), 4,174 of 211,833 participants developed diabetes. The incidence of diabetes was 7.35 per 1,000 person-year with age-standardization (Table 2). The risk of incident diabetes increased proportionally with age and BMI values (Table 2). For every 10 years of increasing age, the hazard ratio (HR) of developing diabetes increased by 88% (95% CI: 1.85, 1.92). Using participants ages 20-30-years-old as the reference, the BMI-adjusted HR for incident diabetes was 1.64 (95% CI: 1.29-2.09) in participants ages 30-40-years-old, 3.83 (95% CI: 3.03, 4.86) in participants ages 40-50-years-old, 8.39 (95% CI: 6.64, 10.59) in participants ages 50-60-years-old, 11.77 (95% CI: 9.30, 14.89) in participants ages 60-70-years-old, and 17.55 (95% CI: 13.79, 22.33) in participants ≥ 70-years-old. Using participants with a BMI of 18.5-<24.0 kg/m<sup>2</sup> as reference, the age-adjusted HR for incident diabetes was 0.39 (95% CI: 0.27-0.56) in participants with a BMI of <18.5 kg/m<sup>2</sup>, 2.51 (95% CI: 2.33, 2.70) with a BMI of 24.0-27.9 kg/m<sup>2</sup>, and 5.58 (95% CI: 5.13, 6.07) with a BMI of ≥28.0 kg/m<sup>2</sup>. Further adjustment for sex,

1  
2  
3 smoking status, drinking status, and family history of diabetes did not alter the trend  
4  
5 appreciably.  
6  
7

8 Sex-adjusted HRs (95% CI) of BMI for risk of incident diabetes are shown in  
9  
10 Figure 1 and Supplementary Table 2. Using participants with a BMI of 18.5-<24.0  
11  
12 kg/m<sup>2</sup> as the reference, the age-adjusted HR for incident diabetes in overweight and  
13  
14 obese individuals was higher at younger ages than older ages. The linear association  
15  
16 between BMI and risk of incident diabetes was present in participants across all age  
17  
18 groups. When BMI was analyzed as a continuous variable, the sex-adjusted HR of  
19  
20 developing diabetes was 1.23 (95% CI: 1.22, 1.24) for each kg/m<sup>2</sup> increase in BMI. A  
21  
22 stronger association between BMI and incident diabetes was shown in the youngest  
23  
24 age group (Table 3). The risk of incident diabetes was increased by 35% (95% CI:  
25  
26 1.29, 1.40) for each kg/m<sup>2</sup> increase of BMI in the 20-30-year-old group, 31% (95%  
27  
28 CI: 1.29, 1.33) in the 30-40-year-old group, 27% (95% CI: 1.25, 1.29) in the 40-50-  
29  
30 year-old group, 18% (95% CI: 1.17, 1.20) in the 50-60-year-old group, 13% (95% CI:  
31  
32 1.11, 1.15) in the 60-70-year-old group, and 11% (95% CI: 1.08, 1.14) in the greater  
33  
34 than 70-years-old group. The descending trend by age remained separately in men and  
35  
36 women, and was not altered by further adjustment for smoking status, drinking status,  
37  
38 and family history of diabetes. Obviously, age significantly modified the association  
39  
40 between BMI and the risk of incident diabetes (age × BMI interaction,  $P < 0.0001$ ).  
41  
42  
43  
44  
45  
46  
47  
48  
49

50 Current smokers were at a decreased risk of incident diabetes (HR: 0.79; 95%CI:  
51  
52 0.74, 0.84), and participants with a family history of diabetes were at an increased risk  
53  
54 of incident diabetes (HR: 1.68; 95%CI: 1.38-2.03). The multiplicative interactions of  
55  
56  
57  
58  
59  
60



1  
2  
3 BMI × smoking status ( $P$  for interaction=0.25) and age × family history of diabetes ( $P$   
4 for interaction=0.71) in regards to the risk of incident diabetes were not significant  
5  
6  
7  
8 (Supplementary table 3).  
9  
10  
11  
12  
13  
14  
15  
16  
17  
18  
19  
20  
21  
22  
23  
24  
25  
26  
27  
28  
29  
30  
31  
32  
33  
34  
35  
36  
37  
38  
39  
40  
41  
42  
43  
44  
45  
46  
47  
48  
49  
50  
51  
52  
53  
54  
55  
56  
57  
58  
59  
60

## DISCUSSION

In the present cohort, an age-standardized diabetes incidence of 7.35 per 1,000 person-year during 2010-2016 was detected. We demonstrated a linear association between baseline BMI and the risk of developing diabetes, which increased with each  $\text{kg/m}^2$  of BMI, associated with 23% (95% CI: 1.22, 1.24) higher risk of incident diabetes. The risk of incident diabetes was increased by 35% (95% CI: 1.29, 1.40) for each  $\text{kg/m}^2$  increase of BMI in the 20-30-year-old group and 31% (95% CI: 1.29, 1.33) in the 30-40-year-old group. However, the risk of incident diabetes was slightly lower in the 40-50, 50-60, and 60-70-year-old group: 1.27 (95% CI: 1.25, 1.29), 1.18 (95% CI: 1.17, 1.20), and 1.13 (95% CI: 1.11, 1.15), respectively. Again, the HR of incident diabetes was the lowest in the 70-year-old group at 1.11 (95% CI: 1.08, 1.14). Further analyses showed that age had a modifying effect on this association. Overall, the effect of BMI on incident diabetes was stronger in younger adults. Subgroup analyses showed that the interactions between BMI and smoking status or age and family history of diabetes, in regards to the risk of incident diabetes, were not significant.

Our study reported an age-standardized diabetes incidence of 7.35 per 1,000 person-year during 2010-2016. With lifestyle changes, the prevalence of type 2 diabetes has increased rapidly in the past decades in China. Data from national surveys show that the prevalence of diabetes was 0.9% in 1980 [17], 2.5% in 1994 [18], 9.7% in 2007 [19], and 10.9% in 2013 [20]. However, the incidence of diabetes appears to have stabilized and there have been small declines from 2007 to 2014 [21],

1  
2  
3 which is not consistent with the prevalence trend. Based on our large sample cohort,  
4  
5 the incidence of diabetes increased by 7.35 per 1,000 person-years between 2010 and  
6  
7 2016. All diabetes diagnoses were based on a self-reported diagnosis of diabetes  
8  
9 and/or a fasting glucose level equal to or greater than 7.0 mmol/L. As such, we could  
10  
11 have missed some cases of type 2 diabetes. The Diabetes Epidemiology Collaborative  
12  
13 Analysis of Diagnostic Criteria in Europe (DECODE) and Asia (DECODA) studies  
14  
15 show that fasting glucose alone only detected about 68% of new diabetic patients in  
16  
17 Europe [22] and 55% of new diabetic patients in Asia [23]. And national surveys have  
18  
19 reported 46.6% of Chinese with undiagnosed diabetes had isolated increased 2-h  
20  
21 plasma glucose after an oral glucose tolerance test. Therefore, the true estimated  
22  
23 incidence of diabetes should be higher than the data from this study. However, oral  
24  
25 glucose tolerance tests are not applicable for large sample survey due to its  
26  
27 complexity to operate.  
28  
29  
30  
31  
32  
33  
34

35 Obesity is the major risk factor for diabetes development. Hartemink N et al.  
36  
37 conducted a meta-analysis that detected a dose-response relationship between body  
38  
39 mass index and type 2 diabetes. It was shown that per  $\text{kg/m}^2$  increase in BMI, the risk  
40  
41 of diabetes increased by 18% (95% CI: 1.16-1.20), accounting for the heterogeneity  
42  
43 among studies [24]. The etiological effects of BMI have mostly been extrapolated  
44  
45 from the European population, while Chinese individuals tend to have a higher  
46  
47 incidence of diabetes and related risk factors per unit increase in BMI [25, 26]. In the  
48  
49 present study, the age-adjusted HR for incident diabetes was 2.51 (95% CI: 2.33,  
50  
51 2.70) in overweight individuals with a BMI of 24.0-27.9  $\text{kg/m}^2$ , and 5.58 (95% CI:  
52  
53  
54  
55  
56  
57  
58  
59  
60

1  
2  
3 5.13, 6.07) in obese individuals with a BMI of  $\geq 28.0$  kg/m<sup>2</sup>, compared with normal  
4 weight individuals with a BMI of 18.5-<24.0 kg/m<sup>2</sup>. Our HR of diabetes incidence per  
5 kg/m<sup>2</sup> increase in BMI was 1.23 (95% CI: 1.22-1.24), which was slightly higher than  
6 previously reported [24]. Moreover, it was interesting to find that the HR was  
7 significantly higher in younger adults less than 40-years-old.  
8  
9

10  
11  
12  
13  
14  
15  
16 Young age itself is a remarkable protective factor for developing diabetes. While  
17 most of the increase in the prevalence of T2DM has been seen in the middle-aged and  
18 elderly, there is strong evidence that it is becoming more common among young  
19 adults. The increasing prevalence of obesity in young individuals has been speculated  
20 to at least partly explain the increasing prevalence of diabetes in young adults.  
21  
22 However, the available data on diabetes in younger populations is limited. Recent  
23 studies have shown the association between BMI and its outcomes more significantly  
24 varied in younger versus older adults. The global BMI mortality collaboration,  
25 including 239 prospective studies in four continents, found that the risk of mortality  
26 per unit increase in BMI was greater in younger than in older people [12]. However,  
27 the effect of age on the association between BMI and kidney disease appears to be the  
28 opposite [13]. The heterogeneity of age on the association of obesity and type 2  
29 diabetes has been assessed in only a few studies with inconsistent results. Data from  
30 the Third National Health and Nutrition Examination Survey showed that BMI was  
31 strongly associated with an increased relative risk of developing a metabolic disorder,  
32 including type 2 diabetes and cardiovascular diseases. Furthermore, the association  
33 between BMI and cardiovascular disease and hypertension was reduced with  
34  
35  
36  
37  
38  
39  
40  
41  
42  
43  
44  
45  
46  
47  
48  
49  
50  
51  
52  
53  
54  
55  
56  
57  
58  
59  
60

1  
2  
3 increasing age. However, any modifying effects of age on the association between  
4 BMI and type 2 diabetes were not detected [27]. Meta-analysis data from Japan,  
5  
6 Australia, and New Zealand, demonstrated a stronger association between BMI and  
7  
8 the risk of diabetes in subjects younger than 60-years-old compared to people older  
9  
10 than 70-years-old [28]. However, most of the persons included in this study were  
11  
12 older than 40-years-old. The limited sample size and age range might contribute to  
13  
14 this disparity. Avoiding these factors, we found a generally consistent linear  
15  
16 association between BMI and incident diabetes that weakened with advancing age.  
17  
18 BMI had a much greater risk on incident diabetes in earlier adulthood than in later  
19  
20 adulthood, which was consistent with the findings from a meta-analysis conducted by  
21  
22 Ni Mhurchu C et al [28], which extends this finding to adults younger than 40-years-  
23  
24 old.  
25  
26  
27  
28  
29  
30  
31  
32

33 The mechanism(s) responsible for the heterogeneity of BMI effect in regards to  
34  
35 age are unclear. Young onset obesity has been reported to have more genetic  
36  
37 predisposition to metabolic disorders, and resulted in chronically increased levels of  
38  
39 circulating free fatty acids and adipokines, which reduced insulin sensitivity and  
40  
41 might contribute to increased reactive oxygen species and impaired insulin secretion  
42  
43 [29, 30]. Furthermore, young onset obesity patients might have an early life exposure  
44  
45 to maternal undernutrition or over-nutrition, which is associated with an increased risk  
46  
47 of type 2 diabetes [31, 32]. And individuals with young onset obesity tend to have a  
48  
49 detrimental/inactive lifestyle, which might also contribute to the development of  
50  
51 adiposity, insulin resistance, hyperglycaemia, and other cardiovascular risk factors  
52  
53  
54  
55  
56  
57  
58  
59  
60

1  
2  
3 [33, 34]. Therefore, obese youth lose the protective effects of a young age in regards  
4  
5 to diabetes risk. On the other side, weight constitutes of fat and muscle. The decrease  
6  
7 in body weight by increasing age can be explained by the process of sarcopenia with  
8  
9 significant decreases in muscle mass combined with slightly increases in fat mass  
10  
11 [35]. An additional process associated with aging is fat redistribution. Subcutaneous  
12  
13 fat which was considered as metabolic protective is redistributed to visceral fat that  
14  
15 pose greater metabolic risk as visceral adiposity is more strongly linked with many  
16  
17 conditions. However, these age-related changes in BMI should theoretically increase  
18  
19 the diabetes risk associated with BMI, rather weaken the association between BMI  
20  
21 and diabetes.  
22  
23  
24  
25  
26

27  
28 Smoking is a concern in the analysis of BMI-diabetes associations, because  
29  
30 smoking is associated with decreased body weight and an increased risk of diabetes  
31  
32 [36]. In our study, smoking status was statistically adjusted. The interaction between  
33  
34 BMI and smoking status on the risk of incident diabetes was explored, and no  
35  
36 statistically significant associations were found. Previous studies have reported that  
37  
38 the risk of type 2 diabetes in youth is usually increased in persons with a family  
39  
40 history of diabetes [37]. Similarly, we found that a family history of diabetes is an  
41  
42 independent risk factor for type 2 diabetes. However, no interaction between age and  
43  
44 family history of diabetes were detected.  
45  
46  
47  
48  
49

50 In addition to the large sample size, the major strength of our study is that our  
51  
52 sample was comprised of young, middle, and old-aged apparently healthy adults,  
53  
54 while participants in many other cohorts tended to be older. Furthermore, the data  
55  
56  
57  
58  
59  
60

1  
2  
3  
4 were collected under standardized conditions, and the study followed uniform  
5  
6 procedures performed by trained staff. Laboratory methods were also carefully  
7  
8 standardized with rigorous internal and external quality controls. Some limitations  
9  
10 also existed in our present study. One limitation of our study is that our analysis was  
11  
12 not performed on a representative sample of the population, which limits the  
13  
14 generalizability of this study; however, data come from sites in China and age range is  
15  
16 wide. The results of the current study will have wide applicability for the population  
17  
18 in China. We did not distinguish between type 1 and type 2 diabetes in the present  
19  
20 study. However, because type 2 diabetes accounts for about 95% of all diabetes cases,  
21  
22 our findings are likely more representative of type 2 diabetes [38]. In addition, we  
23  
24 only measured body weight and height at baseline, which did not evaluate fat  
25  
26 distribution and weight changes. Finally, even though we adjusted for an extensive set  
27  
28 of confounding factors, residual confounding due to the measurement error in the  
29  
30 assessment of confounding factors, unmeasured factors such as physical activity, and  
31  
32 dietary factors, cannot be excluded.  
33  
34  
35  
36  
37  
38  
39

40 In summary, we demonstrated BMI is independently associated with an  
41  
42 increased risk of incident diabetes not only in older adults but also in younger adults.  
43  
44 This information extends our existing knowledge to show BMI has a much greater  
45  
46 effect on the incidence of diabetes in younger adults. This novel observation likely  
47  
48 helps to explain the emerging epidemic of young-onset diabetes, suggesting that it is  
49  
50 driven by weight gain and obesity in China. Strategically, it is crucial to prevent  
51  
52 diabetes by controlling risk factors, such as weight gain or excessive weight,  
53  
54  
55  
56  
57  
58  
59  
60

1  
2  
3 particularly in younger adults.  
4  
5  
6  
7  
8  
9  
10  
11  
12  
13  
14  
15  
16  
17  
18  
19  
20  
21  
22  
23  
24  
25  
26  
27  
28  
29  
30  
31  
32  
33  
34  
35  
36  
37  
38  
39  
40  
41  
42  
43  
44  
45  
46  
47  
48  
49  
50  
51  
52  
53  
54  
55  
56  
57  
58  
59  
60

For peer review only



**References:**

1. IDF Atlas: About 415 Million Adults Worldwide Have Diabetes. Medscape December 02, 2015.
2. Li MZ, Su L, Liang BY, Tan JJ, Chen Q, Long JX, et al. Trends in prevalence, awareness, treatment, and control of diabetes mellitus in mainland china from 1979 to 2012. *International journal of endocrinology* 2013;2013:753150.
3. Huo X, Gao L, Guo L, Xu W, Wang W, Zhi X, et al. Risk of non-fatal cardiovascular diseases in early-onset versus late-onset type 2 diabetes in China: a cross-sectional study. *The lancet Diabetes & endocrinology* 2016; 4:115-24.
4. Li L, Ji L, Guo X, Ji Q, Gu W, Zhi X, et al. Prevalence of microvascular diseases among tertiary care Chinese with early versus late onset of type 2 diabetes. *Journal of diabetes and its complications* 2015; 29:32-7.
5. Song, S. H. Emerging type 2 diabetes in young adults. *Adv. Exp. Med. Biol.* 771, 51–61 (2012).
6. Abdullah A, Peeters A, de Courten M, Stoelwinder J. The magnitude of association between overweight and obesity and the risk of diabetes: a meta-analysis of prospective cohort studies. *Diabetes research and clinical practice* 2010;89:309-19.
7. Kalra S. Diabetesity. *J Pak Med Assoc.* 2013;63(4):532–4.
8. Houston DK, Nicklas BJ, Zizza CA. Weighty concerns: the growing prevalence of obesity among older adults. *Journal of the American Dietetic Association* 2009;109:1886-95.

- 1  
2  
3  
4 9. Lindstrom J, Tuomilehto J. The diabetes risk score: a practical tool to predict type  
5  
6 2 diabetes risk. *Diabetes Care* 2003;26:725-31.  
7
- 8  
9 10. Wilson PW, Meigs JB, Sullivan L, Fox CS, Nathan DM, D'Agostino RB, Sr.  
10  
11 Prediction of incident diabetes mellitus in middle-aged adults: the Framingham  
12  
13 Offspring Study. *Archives of internal medicine* 2007;167:1068-74.  
14
- 15  
16 11. Collaboration NCDRF. Worldwide trends in body-mass index, underweight,  
17  
18 overweight, and obesity from 1975 to 2016: a pooled analysis of 2416 population-  
19  
20 based measurement studies in 128.9 million children, adolescents, and adults.  
21  
22 *Lancet* 2017.  
23
- 24  
25 12. Global BMIMC. Body-mass index and all-cause mortality: individual-participant-  
26  
27 data meta-analysis of 239 prospective studies in four continents. *Lancet*  
28  
29 2016;388:776-86.  
30  
31
- 32  
33 13. Lu JL, Molnar MZ, Naseer A, Mikkelsen MK, Kalantar-Zadeh K, Kovesdy CP.  
34  
35 Association of age and BMI with kidney function and mortality: a cohort study.  
36  
37 *The lancet Diabetes & endocrinology* 2015;3:704-14.  
38  
39
- 40  
41 14. Asia Pacific Cohort Studies C, Ni Mhurchu C, Parag V, Nakamura M, Patel A,  
42  
43 Rodgers A, et al. Body mass index and risk of diabetes mellitus in the Asia-Pacific  
44  
45 region. *Asia Pacific journal of clinical nutrition* 2006;15:127-33.  
46
- 47  
48 15. National Bureau of Statistics of China. *China statistical yearbook 2011*. Beijing:  
49  
50 China Statistics Press, 2011.  
51
- 52  
53 16. Chinese Medical Association Society of Endocrinology Group Obesity. Expert  
54  
55 consensus for Chinese adult obesity prevention and control. *Chin J Endocrinol*  
56  
57  
58  
59  
60

- 1  
2  
3 Metab 2011;27(9): 711-717.  
4  
5  
6 17. National Diabetes Research Group. A mass survey of diabetes mellitus in a  
7  
8 population of 300,000 in 14 provinces and municipalities in China. *Zhonghua nei*  
9  
10 *ke za zhi* 1981;20:678-83.  
11  
12  
13 18. Pan XR, Yang WY, Li GW, Liu J. Prevalence of diabetes and its risk factors in  
14  
15 China, 1994. National Diabetes Prevention and Control Cooperative Group.  
16  
17 *Diabetes Care* 1997;20:1664-9.  
18  
19  
20 19. Yang W, Lu J, Weng J, Jia W, Ji L, Xiao J, et al. Prevalence of diabetes among  
21  
22 men and women in China. *The New England journal of medicine* 2010;362:1090-  
23  
24 101.  
25  
26  
27 20. Xu Y, Wang L, He J, Bi Y, Li M, Wang T, et al. Prevalence and control of  
28  
29 diabetes in Chinese adults. *JAMA* 2013;310:948-59.  
30  
31  
32 21. Quan J, Li TK, Pang H, Choi CH, Siu SC, Tang SY, et al. Diabetes incidence and  
33  
34 prevalence in Hong Kong, China during 2006-2014. *Diabetic medicine : a journal*  
35  
36 *of the British Diabetic Association* 2017;34:902-8.  
37  
38  
39 22. Will new diagnostic criteria for diabetes mellitus change phenotype of patients  
40  
41 with diabetes? Reanalysis of European epidemiological data. DECODE Study  
42  
43 Group on behalf of the European Diabetes Epidemiology Study Group. *BMJ*,  
44  
45 1998. 317(7155): p. 371-5.  
46  
47  
48 23. Qiao, Q., et al., Age- and sex-specific prevalence of diabetes and impaired glucose  
49  
50 regulation in 11 Asian cohorts. *Diabetes Care*, 2003. 26(6): p. 1770-80.  
51  
52  
53 24. Hartemink N, Boshuizen HC, Nagelkerke NJ, Jacobs MA, van Houwelingen HC.  
54  
55  
56  
57  
58  
59  
60

- 1  
2  
3  
4 Combining risk estimates from observational studies with different exposure  
5  
6 cutpoints: a meta-analysis on body mass index and diabetes type 2. *American*  
7  
8 *journal of epidemiology* 2006;163:1042-52.  
9
- 10  
11 25. Wang D, Li Y, Lee SG, Wang L, Fan J, Zhang G, et al. Ethnic differences in body  
12  
13 composition and obesity related risk factors: study in Chinese and white males  
14  
15 living in China. *PloS one* 2011;6:e19835.  
16  
17
- 18 26. Khoo CM, Sairazi S, Taslim S, Gardner D, Wu Y, Lee J, et al. Ethnicity modifies  
19  
20 the relationships of insulin resistance, inflammation, and adiponectin with obesity  
21  
22 in a multiethnic Asian population. *Diabetes Care* 2011;34:1120-6.  
23  
24
- 25 27. Canning KL, Brown RE, Jamnik VK, Kuk JL. Relationship between obesity and  
26  
27 obesity-related morbidities weakens with aging. *The journals of gerontology*  
28  
29 *Series A, Biological sciences and medical sciences* 2014;69:87-92.  
30  
31
- 32 28. Asia Pacific Cohort Studies C, Ni Mhurchu C, Parag V, Nakamura M, Patel A,  
33  
34 Rodgers A, et al. Body mass index and risk of diabetes mellitus in the Asia-Pacific  
35  
36 region. *Asia Pacific journal of clinical nutrition* 2006;15:127-33.  
37  
38
- 39 29. Lumeng CN, Saltiel AR. Inflammatory links between obesity and metabolic  
40  
41 disease. *The Journal of clinical investigation* 2011;121:2111-7.  
42  
43  
44
- 45 30. Reinehr T, Karges B, Meissner T, Wiegand S, Stoffel-Wagner B, Holl RW, et al.  
46  
47 Inflammatory Markers in Obese Adolescents with Type 2 Diabetes and Their  
48  
49 Relationship to Hepatokines and Adipokines. *The Journal of pediatrics*  
50  
51 *2016;173:131-5.*  
52  
53
- 54 31. Vrachnis N, Antonakopoulos N, Iliodromiti Z, Dafopoulos K, Siristatidis C,  
55  
56  
57  
58  
59  
60

- 1  
2  
3 Pappa KI, et al. Impact of maternal diabetes on epigenetic modifications leading  
4 to diseases in the offspring. *Experimental diabetes research* 2012;2012:538474.  
5  
6  
7  
8  
9 32. Pettitt DJ, Lawrence JM, Beyer J, Hillier TA, Liese AD, Mayer-Davis B, et al.  
10 Association between maternal diabetes in utero and age at offspring's diagnosis of  
11 type 2 diabetes. *Diabetes Care* 2008;31:2126-30..  
12  
13  
14  
15 33. Dollman J, Norton K, Norton L. Evidence for secular trends in children's physical  
16 activity behaviour. *British journal of sports medicine* 2005;39:892-7; discussion 7.  
17  
18  
19  
20 34. Gustat J, Srinivasan SR, Elkasabany A, Berenson GS. Relation of self-rated  
21 measures of physical activity to multiple risk factors of insulin resistance  
22 syndrome in young adults: the Bogalusa Heart Study. *Journal of clinical*  
23 *epidemiology* 2002;55:997-1006.  
24  
25  
26  
27  
28  
29  
30 35. Cruz-Jentoft, A.J., et al., Prevalence of and interventions for sarcopenia in ageing  
31 adults: a systematic review. Report of the International Sarcopenia Initiative  
32 (EWGSOP and IWGS). *Age Ageing*, 2014. 43(6): p. 748-59.  
33  
34  
35  
36  
37 36. Yeh HC, Duncan BB, Schmidt MI, Wang NY, Brancati FL. Smoking, smoking  
38 cessation, and risk for type 2 diabetes mellitus: a cohort study. *Annals of internal*  
39 *medicine* 2010;152:10-7.  
40  
41  
42  
43  
44  
45 37. Malecka-Tendera E, Erhardt E, Molnar D. Type 2 diabetes mellitus in European  
46 children and adolescents. *Acta paediatrica* 2005;94:543-6.  
47  
48  
49  
50 38. World Health Organization. Prevention of diabetes mellitus.  
51  
52 [http://whqlibdoc.who.int/trs/WHO\\_TRS\\_844.pdf](http://whqlibdoc.who.int/trs/WHO_TRS_844.pdf). Accessed December 28, 2012.  
53  
54  
55  
56  
57  
58  
59  
60

Table 1  
Baseline characteristics of participants free of diabetes according to age groups

|                                | Age group, y      |                   |                   |                   |                   |                   | P for trend |
|--------------------------------|-------------------|-------------------|-------------------|-------------------|-------------------|-------------------|-------------|
|                                | 20 to <30         | 30 to <40         | 40 to <50         | 50 to <60         | 60 to <70         | ≥70               |             |
| <b>Male</b>                    |                   |                   |                   |                   |                   |                   |             |
| Participants, n                | 15833             | 45049             | 23729             | 17460             | 9673              | 4379              |             |
| BMI, kg/m <sup>2</sup>         | 23.0 (3.6)        | 24.1 (3.4)        | 24.6 (3.0)        | 24.7 (2.9)        | 24.7 (2.9)        | 24.2 (3.1)        | < 0.0001    |
| Current smoker, %              | 19.3              | 21.7              | 37.7              | 53.9              | 43.2              | 23.6              | < 0.0001    |
| Current drinker, %             | 1.0               | 1.7               | 4.8               | 6.7               | 6.8               | 3.1               | < 0.0001    |
| Fasting plasma glucose, mmol/L | 4.86 (0.51)       | 4.86 (0.59)       | 4.99 (0.63)       | 5.14 (0.67)       | 5.21 (0.68)       | 5.26 (0.68)       | < 0.0001    |
| Systolic blood pressure, mmHg  | 122 (13)          | 120 (13)          | 121 (15)          | 125 (17)          | 130 (18)          | 139 (19)          | < 0.0001    |
| Diastolic blood pressure, mmHg | 73 (9)            | 75 (10)           | 78 (11)           | 80 (11)           | 80 (11)           | 79 (11)           | < 0.0001    |
| Total cholesterol, mmol/L      | 4.32 (0.81)       | 4.64 (0.86)       | 4.87 (0.88)       | 4.95 (0.89)       | 4.95 (0.89)       | 4.89 (0.88)       | < 0.0001    |
| Triglyceride, mmol/L           | 0.99 (0.70, 1.40) | 1.22 (0.86, 1.80) | 1.45 (1.00, 2.15) | 1.50 (1.02, 2.19) | 1.40 (1.00, 2.00) | 1.27 (0.92, 1.78) | < 0.0001    |
| LDL-C, mmol/L                  | 2.55 (0.60)       | 2.72 (0.66)       | 2.85 (0.67)       | 2.89 (0.68)       | 2.90 (0.69)       | 2.84 (0.66)       | < 0.0001    |
| HDL-C, mmol/L                  | 1.32 (0.24)       | 1.28 (0.27)       | 1.28 (0.28)       | 1.29 (0.30)       | 1.29 (0.29)       | 1.32 (0.29)       | 0.11        |
| Family history of diabetes, %  | 0.61              | 1.59              | 2.14              | 1.43              | 0.65              | 0.14              | 0.01        |
| <b>Female</b>                  |                   |                   |                   |                   |                   |                   |             |
| Participants, n                | 12800             | 37927             | 21685             | 12546             | 7861              | 2891              |             |
| BMI, kg/m <sup>2</sup>         | 20.6 (2.7)        | 21.4 (2.9)        | 22.5 (2.9)        | 23.4 (2.9)        | 23.8 (3.1)        | 24.0 (3.4)        | < 0.0001    |
| Current smoker, %              | 0.12              | 0.13              | 0.14              | 0.04              | 0.32              | 0.15              | 0.43        |
| Current drinker, %             | 0.12              | 0.11              | 0.20              | 0.13              | 0.13              | 0.15              | 0.70        |
| Fasting plasma glucose, mmol/L | 4.73 (0.50)       | 4.74 (0.55)       | 4.86 (0.57)       | 5.00 (0.61)       | 5.12 (0.63)       | 5.19 (0.69)       | < 0.0001    |
| Systolic blood pressure, mmHg  | 110 (12)          | 109 (12)          | 113 (15)          | 122 (17)          | 130 (18)          | 141 (20)          | < 0.0001    |
| Diastolic blood pressure, mmHg | 69 (9)            | 69 (9)            | 71 (10)           | 76 (11)           | 77 (11)           | 77 (12)           | < 0.0001    |
| Total cholesterol, mmol/L      | 4.34 (0.78)       | 4.44 (0.79)       | 4.64 (0.81)       | 5.14 (0.93)       | 5.46 (0.94)       | 5.50 (0.96)       | < 0.0001    |
| Triglyceride, mmol/L           | 0.71 (0.55, 0.95) | 0.78 (0.59, 1.06) | 0.86 (0.63, 1.20) | 1.10 (0.80, 1.58) | 1.36 (1.00, 1.92) | 1.47 (1.09, 2.02) | < 0.0001    |
| LDL-C, mmol/L                  | 2.47 (0.59)       | 2.54 (0.60)       | 2.69 (0.62)       | 3.03 (0.71)       | 3.21 (0.74)       | 3.20 (0.73)       | < 0.0001    |
| HDL-C, mmol/L                  | 1.51 (0.30)       | 1.46 (0.31)       | 1.46 (0.30)       | 1.47 (0.32)       | 1.47 (0.32)       | 1.48 (0.32)       | 0.05        |
| Family history of diabetes, %  | 1.72              | 2.82              | 4.08              | 3.00              | 1.77              | 0.62              | 0.45        |

1  
2  
3  
4  
5  
6  
7  
8  
9  
10  
11  
12  
13  
14  
15  
16  
17  
18  
19  
20  
21  
22  
23  
24  
25  
26  
27  
28  
29  
30  
31  
32  
33  
34  
35  
36  
37  
38  
39  
40  
41  
42  
43  
44  
45  
46  
47

Data are mean (SD), or median (IQR), or proportions.

For peer review only

Table 2

Association between age and body mass index with risk of incident diabetes in Chinese adults

|                                    | N0. of participants | N0. of events | Incidence rate<br>(per 1000 persons per year) | Hazard Ratios                 |                                             |
|------------------------------------|---------------------|---------------|-----------------------------------------------|-------------------------------|---------------------------------------------|
| Age, y                             |                     |               |                                               | Body mass index -<br>adjusted | Multivariable-adjusted<br>+ body mass index |
| 20 to <30                          | 28633               | 75            | 0.93                                          | Ref.                          | Ref.                                        |
| 30 to <40                          | 82976               | 546           | 2.18                                          | 1.64 (1.29, 2.09)             | 2.07 (1.24, 3.47)                           |
| 40 to <50                          | 45414               | 789           | 5.45                                          | 3.83 (3.03, 4.86)             | 4.83 (2.90, 8.03)                           |
| 50 to <60                          | 30006               | 1224          | 12.50                                         | 8.39 (6.64, 10.59)            | 12.26 (7.42, 20.27)                         |
| 60 to <70                          | 17534               | 976           | 17.61                                         | 11.77 (9.30, 14.89)           | 15.50 (9.34, 25.70)                         |
| ≥70                                | 7270                | 564           | 22.39                                         | 17.55 (13.79, 22.33)          | 21.98 (13.14, 36.77)                        |
| P for trend                        | -                   | -             | -                                             | < 0.0001                      | < 0.0001                                    |
| Crude rate                         | 211833              | 4174          | 6.17                                          | -                             | -                                           |
| Standardized rate <sup>†</sup>     | 211833              | 4174          | 7.35                                          | -                             | -                                           |
| Body mass index, kg/m <sup>2</sup> |                     |               |                                               | Age-adjusted                  | Multivariable-adjusted                      |
| <18.5                              | 12081               | 31            | 0.82                                          | 0.39 (0.27, 0.56)             | 0.46 (0.24, 0.90)                           |
| 18.5-<24.0                         | 116812              | 1073          | 2.72                                          | Ref.                          | Ref.                                        |
| 24.0-<28.0                         | 64774               | 1936          | 9.44                                          | 2.51 (2.33, 2.70)             | 2.36 (2.04, 2.73)                           |
| ≥28.0                              | 18166               | 1134          | 21.00                                         | 5.58 (5.13, 6.07)             | 5.22 (4.44, 6.13)                           |
| P for trend                        |                     |               |                                               | < 0.0001                      | < 0.0001                                    |

<sup>†</sup>The incidence rate was standardized to the population of mainland China in 2010.

Multivariable-adjusted model adjusted for age, sex, smoking status, drinking status, family history of diabetes.



Table 3  
Association of per kg/m<sup>2</sup> increase of body mass index and incident diabetes, by baseline age group

| Age, y                   | HR                |                        |
|--------------------------|-------------------|------------------------|
|                          | Sex-adjusted      | Multivariable-adjusted |
| 20 to <30                | 1.35 (1.29, 1.40) | 1.39 (1.27, 1.52)      |
| 30 to <40                | 1.31 (1.29, 1.33) | 1.30 (1.26, 1.34)      |
| 40 to <50                | 1.27 (1.25, 1.29) | 1.27 (1.23, 1.32)      |
| 50 to <60                | 1.18 (1.17, 1.20) | 1.17 (1.13, 1.21)      |
| 60 to <70                | 1.13 (1.11, 1.15) | 1.14 (1.10, 1.19)      |
| ≥70                      | 1.11 (1.08, 1.14) | 1.12 (1.07, 1.17)      |
| Age × BMI interaction, P | < 0.0001          | < 0.0001               |

  

| Male                     |                   |                        |
|--------------------------|-------------------|------------------------|
| Age, y                   | Non-adjusted      | Multivariable-adjusted |
| 20 to <30                | 1.37 (1.31, 1.44) | 1.41 (1.29, 1.55)      |
| 30 to <40                | 1.31 (1.29, 1.34) | 1.30 (1.26, 1.35)      |
| 40 to <50                | 1.26 (1.23, 1.28) | 1.25 (1.20, 1.30)      |
| 50 to <60                | 1.18 (1.16, 1.21) | 1.17 (1.13, 1.21)      |
| 60 to <70                | 1.14 (1.11, 1.17) | 1.17 (1.11, 1.23)      |
| ≥70                      | 1.13 (1.09, 1.17) | 1.16 (1.10, 1.24)      |
| Age × BMI interaction, P | < 0.0001          | 0.0004                 |

  

| Female                   |                   |                        |
|--------------------------|-------------------|------------------------|
| Age, y                   | Non-adjusted      | Multivariable-adjusted |
| 20 to <30                | 1.29 (1.19, 1.40) | 1.31 (1.21, 1.43)      |
| 30 to <40                | 1.30 (1.26, 1.34) | 1.30 (1.26, 1.35)      |
| 40 to <50                | 1.31 (1.26, 1.35) | 1.29 (1.24, 1.34)      |
| 50 to <60                | 1.19 (1.15, 1.22) | 1.18 (1.15, 1.21)      |
| 60 to <70                | 1.12 (1.09, 1.15) | 1.12 (1.08, 1.16)      |
| ≥70                      | 1.09 (1.05, 1.13) | 1.09 (1.05, 1.14)      |
| Age × BMI interaction, P | < 0.0001          | < 0.0001               |

Multivariable-adjusted model adjusted for sex, smoking status, drinking status, family history of diabetes.

### Figure legends

Figure 1. Association of body mass index with risk of incident diabetes, by baseline age group. A BMI of 18.5 to 23.9 kg/m<sup>2</sup> was defined as the referent category.

For peer review only

1  
2  
3  
4  
5  
6  
7  
8  
9  
10  
11  
12  
13  
14  
15  
16  
17  
18  
19  
20  
21  
22  
23  
24  
25  
26  
27  
28  
29  
30  
31  
32  
33  
34  
35  
36  
37  
38  
39  
40  
41  
42  
43  
44  
45  
46  
47  
48  
49  
50  
51  
52  
53  
54  
55  
56  
57  
58  
59  
60

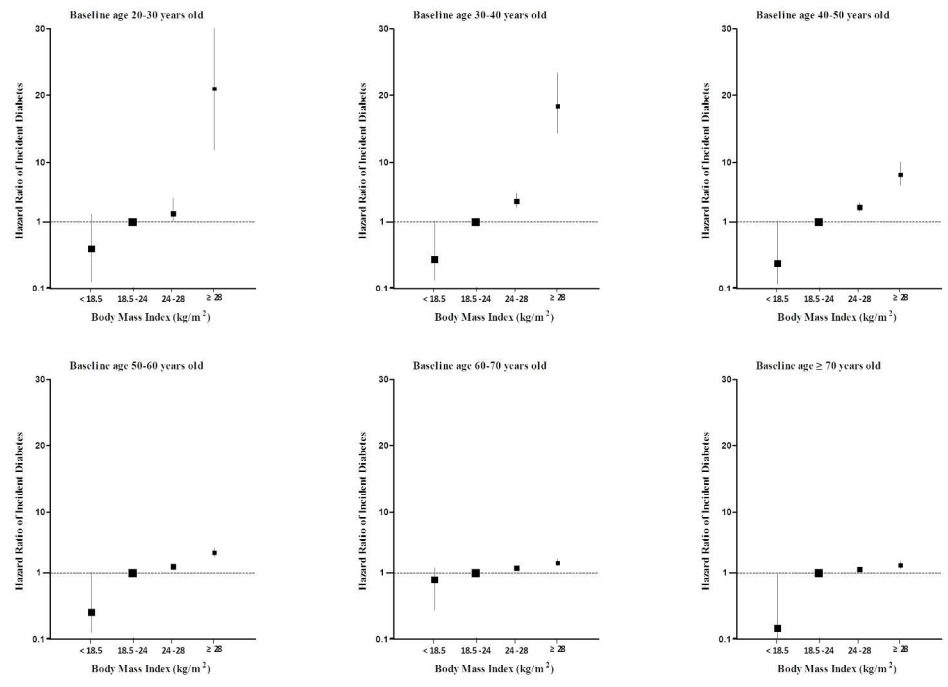

Figure 1. Association of body mass index with risk of incident diabetes, by baseline age group. A BMI of 18.5 to 23.9 kg/m<sup>2</sup> was defined as the referent category.

266x189mm (300 x 300 DPI)

## Supplemental table 1

## Baseline characteristics of participants free of diabetes according to BMI groups

|                                | Body mass index, kg/m <sup>2</sup> |                   |                   |                   | P for trend |
|--------------------------------|------------------------------------|-------------------|-------------------|-------------------|-------------|
|                                | <18.5                              | 18.5-<24.0        | 24.0-<28.0        | ≥28               |             |
| <b>Male</b>                    |                                    |                   |                   |                   |             |
| Participants, n                | 3429                               | 52741             | 46159             | 13793             |             |
| BMI, kg/m <sup>2</sup>         | 17.6 (0.7)                         | 21.8 (1.5)        | 25.7 (1.1)        | 29.9 (1.9)        | < 0.0001    |
| Age, y                         | 36.6 (12.5)                        | 40.9 (12.9)       | 44.2 (12.8)       | 42.9 (12.5)       | < 0.0001    |
| Current smoker, %              | 28.8                               | 28.5              | 32.1              | 35.8              | < 0.0001    |
| Current drinker, %             | 1.7                                | 2.8               | 3.8               | 4.7               | < 0.0001    |
| Fasting plasma glucose, mmol/L | 4.76 (0.56)                        | 4.89 (0.60)       | 5.04 (0.63)       | 5.15 (0.67)       | < 0.0001    |
| Systolic blood pressure, mmHg  | 115 (14)                           | 120 (15)          | 125 (15)          | 130 (16)          | < 0.0001    |
| Diastolic blood pressure, mmHg | 72 (10)                            | 74 (10)           | 78 (11)           | 82 (11)           | < 0.0001    |
| Total cholesterol, mmol/L      | 4.26 (0.80)                        | 4.58 (0.86)       | 4.85 (0.89)       | 4.97 (0.89)       | < 0.0001    |
| Triglyceride, mmol/L           | 0.81 (0.62, 1.05)                  | 1.07 (0.77, 1.51) | 1.50 (1.05, 2.17) | 1.81 (1.30, 2.59) | < 0.0001    |
| LDL-C, mmol/L                  | 2.47 (0.62)                        | 2.71 (0.65)       | 2.85 (0.67)       | 2.91 (0.68)       | < 0.0001    |
| HDL-C, mmol/L                  | 1.44 (0.30)                        | 1.33 (0.28)       | 1.25 (0.27)       | 1.22 (0.27)       | < 0.0001    |
| Family history of diabetes, %  | 0.79                               | 1.24              | 1.52              | 1.85              | < 0.0001    |
| <b>Female</b>                  |                                    |                   |                   |                   |             |
| Participants, n                | 8652                               | 64070             | 18614             | 4373              |             |
| BMI, kg/m <sup>2</sup>         | 17.6 (0.7)                         | 21.2 (1.5)        | 25.5 (1.1)        | 30.1 (2.1)        | < 0.0001    |
| Age, y                         | 34.9 (9.2)                         | 40.6 (11.5)       | 47.7 (13.1)       | 48.5 (13.9)       | < 0.0001    |
| Current smoker, %              | 0.05                               | 0.14              | 0.17              | 0.01              | 0.80        |
| Current drinker, %             | 0.10                               | 0.15              | 0.10              | 0.21              | 0.008       |
| Fasting plasma glucose, mmol/L | 4.65 (0.55)                        | 4.80 (0.56)       | 5.02 (0.60)       | 5.16 (0.64)       | < 0.0001    |

|                                |                   |                   |                   |                   |          |
|--------------------------------|-------------------|-------------------|-------------------|-------------------|----------|
| Systolic blood pressure, mmHg  | 108 (13)          | 112 (15)          | 122 (18)          | 129 (18)          | < 0.0001 |
| Diastolic blood pressure, mmHg | 68 (9)            | 70 (10)           | 75 (11)           | 79 (12)           | < 0.0001 |
| Total cholesterol, mmol/L      | 4.43 (0.81)       | 4.62 (0.89)       | 4.92 (0.94)       | 5.03 (0.97)       | < 0.0001 |
| Triglyceride, mmol/L           | 0.70 (0.55, 0.90) | 0.81 (0.60, 1.12) | 1.16 (0.82, 1.67) | 1.43 (1.03, 2.00) | < 0.0001 |
| LDL-C, mmol/L                  | 2.52 (0.61)       | 2.70 (0.68)       | 2.91 (0.71)       | 2.97 (0.72)       | < 0.0001 |
| HDL-C, mmol/L                  | 1.59 (0.33)       | 1.49 (0.31)       | 1.39 (0.28)       | 1.34 (0.26)       | < 0.0001 |
| Family history of diabetes, %  | 1.86              | 2.82              | 3.14              | 3.50              | < 0.0001 |

Data are mean (SD), or median (IQR), or proportions.

## Supplemental table 2

Sex-adjusted HRs of incident diabetes with increasing body mass index, by baseline age groups.

|           | Body mass index, kg/m <sup>2</sup> |                     |                      |                      |
|-----------|------------------------------------|---------------------|----------------------|----------------------|
|           | <18.5                              | 18.5-<24.0          | 24.0-<28.0           | ≥28                  |
| Age, y    |                                    |                     |                      |                      |
| 20 to <30 | 0.56 (0.18, 1.76)                  | 0.77 (0.48, 1.22)   | 1.43 (0.79, 2.61)    | 13.06 (8.98, 19.00)  |
| 30 to <40 | 0.51 (0.22, 1.15)                  | Ref.                | 4.06 (3.18, 5.18)    | 18.03 (14.28, 22.78) |
| 40 to <50 | 1.35 (0.50, 3.65)                  | 3.21 (2.50,4.12)    | 11.07 (8.86, 13.82)  | 28.83 (22.82, 36.42) |
| 50 to <60 | 5.05 (2.06, 12.41)                 | 11.16 (8.91,13.99)  | 22.40 (18.10, 27.72) | 47.17 (37.55, 59.24) |
| 60 to <70 | 18.25 (9.52, 34.97)                | 19.93 (15.85,25.06) | 33.35 (26.87, 41.39) | 48.51 (38.01, 61.92) |
| ≥70       | 7.90 (2.50, 24.91)                 | 32.19 (25.23,41.08) | 48.14 (38.19, 60.69) | 68.30 (51.99, 89.73) |

## Supplemental table 3

Interaction of BMI × smoking status and age × family history of diabetes on the risk of incident diabetes.

|                                                 | HR               |                        |
|-------------------------------------------------|------------------|------------------------|
|                                                 | Unadjusted       | Multivariable-adjusted |
| Risk of per increase of BMI                     |                  |                        |
| Current smoker                                  | 1.84 (1.69-2.00) | 1.97 (1.80-2.15)       |
| Non-smoker                                      | 2.16 (1.76-2.64) | 2.34 (1.86-2.93)       |
| BMI × smoking status interaction, P             | 0.10             | 0.25                   |
| Risk of family history of diabetes              |                  |                        |
| Total                                           | 1.98 (1.70-2.31) | 1.68 (1.38-2.03)       |
| 20 to <30                                       | 2.13 (0.52-8.67) | 4.38 (0.82-23.39)      |
| 30 to <40                                       | 3.06 (2.23-4.21) | 2.81 (1.86-4.24)       |
| 40 to <50                                       | 2.10 (1.59-2.79) | 1.81 (1.25-2.64)       |
| 50 to <60                                       | 1.90 (1.43-2.52) | 1.80 (1.27-2.56)       |
| 60 to <70                                       | 2.04 (1.36-3.06) | 1.44 (0.85-2.42)       |
| ≥70                                             | 1.35 (0.43-4.20) | 0.78 (0.19-3.22)       |
| Age × family history of diabetes interaction, P | 0.45             | 0.71                   |

Multivariable-adjusted model adjusted for age, sex, smoking status, drinking status, family history of diabetes, except the strata variable.

**The RECORD statement – checklist of items, extended from the STROBE statement, that should be reported in observational studies using routinely collected health data.**

|                           | Item No. | STROBE items                                                                                                                                                                               | Location in manuscript where items are reported | RECORD items                                                                                                                                                                                                                                                                                                                                                                                                                                | Location in manuscript where items are reported                                                   |
|---------------------------|----------|--------------------------------------------------------------------------------------------------------------------------------------------------------------------------------------------|-------------------------------------------------|---------------------------------------------------------------------------------------------------------------------------------------------------------------------------------------------------------------------------------------------------------------------------------------------------------------------------------------------------------------------------------------------------------------------------------------------|---------------------------------------------------------------------------------------------------|
| <b>Title and abstract</b> |          |                                                                                                                                                                                            |                                                 |                                                                                                                                                                                                                                                                                                                                                                                                                                             |                                                                                                   |
|                           | 1        | (a) Indicate the study's design with a commonly used term in the title or the abstract (b) Provide in the abstract an informative and balanced summary of what was done and what was found |                                                 | RECORD 1.1: The type of data used should be specified in the title or abstract. When possible, the name of the databases used should be included.<br><br>RECORD 1.2: If applicable, the geographic region and timeframe within which the study took place should be reported in the title or abstract.<br><br>RECORD 1.3: If linkage between databases was conducted for the study, this should be clearly stated in the title or abstract. | (1.1) Abstract, paragraph 2<br><br>(1.2) Abstract, paragraph 3<br><br>(1.3) Abstract, paragraph 5 |
| <b>Introduction</b>       |          |                                                                                                                                                                                            |                                                 |                                                                                                                                                                                                                                                                                                                                                                                                                                             |                                                                                                   |
| Background rationale      | 2        | Explain the scientific background and rationale for the investigation being reported                                                                                                       |                                                 |                                                                                                                                                                                                                                                                                                                                                                                                                                             | Introduction, paragraphs 1-2                                                                      |
| Objectives                | 3        | State specific objectives, including any prespecified hypotheses                                                                                                                           |                                                 |                                                                                                                                                                                                                                                                                                                                                                                                                                             | Introduction, paragraph 2                                                                         |
| <b>Methods</b>            |          |                                                                                                                                                                                            |                                                 |                                                                                                                                                                                                                                                                                                                                                                                                                                             |                                                                                                   |
| Study Design              | 4        | Present key elements of study design early in the paper                                                                                                                                    |                                                 |                                                                                                                                                                                                                                                                                                                                                                                                                                             | Methods, paragraph 1                                                                              |
| Setting                   | 5        | Describe the setting, locations, and relevant dates, including periods of recruitment, exposure, follow-up, and data collection                                                            |                                                 |                                                                                                                                                                                                                                                                                                                                                                                                                                             | Methods, paragraph 1                                                                              |
| Participants              | 6        | (a) <i>Cohort study</i> - Give the eligibility criteria, and the sources and methods of selection of participants. Describe methods                                                        |                                                 | RECORD 6.1: The methods of study population selection (such as codes or algorithms used to identify subjects) should be listed in detail. If                                                                                                                                                                                                                                                                                                | (6.1.) Methods, paragraph 1                                                                       |



|                                                                                                                               |                              |                                                                                                                                                                                                                                                                                                                                                                                                                                                                                                                                                                                          |                                                                                                                                                                                      |                                                                                                                                                                                                                                                                                                                                                                                                                                                                                                                                                         |                                                       |
|-------------------------------------------------------------------------------------------------------------------------------|------------------------------|------------------------------------------------------------------------------------------------------------------------------------------------------------------------------------------------------------------------------------------------------------------------------------------------------------------------------------------------------------------------------------------------------------------------------------------------------------------------------------------------------------------------------------------------------------------------------------------|--------------------------------------------------------------------------------------------------------------------------------------------------------------------------------------|---------------------------------------------------------------------------------------------------------------------------------------------------------------------------------------------------------------------------------------------------------------------------------------------------------------------------------------------------------------------------------------------------------------------------------------------------------------------------------------------------------------------------------------------------------|-------------------------------------------------------|
| 1<br>2<br>3<br>4<br>5<br>6<br>7<br>8<br>9<br>10<br>11<br>12<br>13<br>14<br>15<br>16<br>17<br>18<br>19<br>20<br>21<br>22<br>23 |                              | <p>of follow-up</p> <p><i>Case-control study</i> - Give the eligibility criteria, and the sources and methods of case ascertainment and control selection. Give the rationale for the choice of cases and controls</p> <p><i>Cross-sectional study</i> - Give the eligibility criteria, and the sources and methods of selection of participants</p> <p><i>(b) Cohort study</i> - For matched studies, give matching criteria and number of exposed and unexposed</p> <p><i>Case-control study</i> - For matched studies, give matching criteria and the number of controls per case</p> |                                                                                                                                                                                      | <p>this is not possible, an explanation should be provided.</p> <p>RECORD 6.2: Any validation studies of the codes or algorithms used to select the population should be referenced. If validation was conducted for this study and not published elsewhere, detailed methods and results should be provided.</p> <p>RECORD 6.3: If the study involved linkage of databases, consider use of a flow diagram or other graphical display to demonstrate the data linkage process, including the number of individuals with linked data at each stage.</p> | <p>(6.2) NA</p> <p>(6.3)<br/>Methods, paragraph 1</p> |
| 24<br>25<br>26<br>27<br>28<br>29                                                                                              | Variables                    | 7                                                                                                                                                                                                                                                                                                                                                                                                                                                                                                                                                                                        | Clearly define all outcomes, exposures, predictors, potential confounders, and effect modifiers. Give diagnostic criteria, if applicable.                                            |                                                                                                                                                                                                                                                                                                                                                                                                                                                                                                                                                         | Methods, paragraph 3-5                                |
| 30<br>31<br>32<br>33<br>34<br>35<br>36<br>37                                                                                  | Data sources/<br>measurement | 8                                                                                                                                                                                                                                                                                                                                                                                                                                                                                                                                                                                        | For each variable of interest, give sources of data and details of methods of assessment (measurement). Describe comparability of assessment methods if there is more than one group |                                                                                                                                                                                                                                                                                                                                                                                                                                                                                                                                                         | Methods, paragraph 3-5                                |
| 38<br>39<br>40                                                                                                                | Bias                         | 9                                                                                                                                                                                                                                                                                                                                                                                                                                                                                                                                                                                        | Describe any efforts to address potential sources of bias                                                                                                                            |                                                                                                                                                                                                                                                                                                                                                                                                                                                                                                                                                         | Methods, paragraph 7-8                                |
| 41<br>42                                                                                                                      | Study size                   | 10                                                                                                                                                                                                                                                                                                                                                                                                                                                                                                                                                                                       | Explain how the study size was arrived at                                                                                                                                            |                                                                                                                                                                                                                                                                                                                                                                                                                                                                                                                                                         | Methods, paragraph 1                                  |
| 43<br>44<br>45<br>46<br>47                                                                                                    | Quantitative                 | 11                                                                                                                                                                                                                                                                                                                                                                                                                                                                                                                                                                                       | Explain how quantitative                                                                                                                                                             |                                                                                                                                                                                                                                                                                                                                                                                                                                                                                                                                                         | Methods, paragraph 7                                  |

|                                                                                                                                         |                                  |    |                                                                                                                                                                                                                                                                                                                                                                                                                                                                                                                                                                      |  |                                                                                                                                                                                                                                                              |
|-----------------------------------------------------------------------------------------------------------------------------------------|----------------------------------|----|----------------------------------------------------------------------------------------------------------------------------------------------------------------------------------------------------------------------------------------------------------------------------------------------------------------------------------------------------------------------------------------------------------------------------------------------------------------------------------------------------------------------------------------------------------------------|--|--------------------------------------------------------------------------------------------------------------------------------------------------------------------------------------------------------------------------------------------------------------|
| 1<br>2<br>3<br>4                                                                                                                        | variables                        |    | variables were handled in the analyses. If applicable, describe which groupings were chosen, and why                                                                                                                                                                                                                                                                                                                                                                                                                                                                 |  |                                                                                                                                                                                                                                                              |
| 5<br>6<br>7<br>8<br>9<br>10<br>11<br>12<br>13<br>14<br>15<br>16<br>17<br>18<br>19<br>20<br>21<br>22<br>23<br>24<br>25<br>26<br>27<br>28 | Statistical methods              | 12 | (a) Describe all statistical methods, including those used to control for confounding<br>(b) Describe any methods used to examine subgroups and interactions<br>(c) Explain how missing data were addressed<br>(d) <i>Cohort study</i> – If applicable, explain how loss to follow-up was addressed<br><i>Case-control study</i> – If applicable, explain how matching of cases and controls was addressed<br><i>Cross-sectional study</i> – If applicable, describe analytical methods taking account of sampling strategy<br>(e) Describe any sensitivity analyses |  | (a) Methods, paragraph 6-8<br><br>(b) Methods, paragraph 7-8<br><br>(c) Methods, paragraph 1<br><br>(d) Methods, paragraph 1<br><br><br><br><br><br><br><br><br><br><br><br>(e) Methods, paragraph 8                                                         |
| 29<br>30<br>31<br>32<br>33<br>34<br>35<br>36<br>37<br>38                                                                                | Data access and cleaning methods |    | ..                                                                                                                                                                                                                                                                                                                                                                                                                                                                                                                                                                   |  | RECORD 12.1: Authors should describe the extent to which the investigators had access to the database population used to create the study population.<br><br>RECORD 12.2: Authors should provide information on the data cleaning methods used in the study. |
| 39<br>40<br>41<br>42<br>43<br>44                                                                                                        | Linkage                          |    | ..                                                                                                                                                                                                                                                                                                                                                                                                                                                                                                                                                                   |  | RECORD 12.3: State whether the study included person-level, institutional-level, or other data linkage across two or more                                                                                                                                    |

|                  |    |                                                                                                                                                                                                                                                                                                                                                 |  |                                                                                                                                                                                                                                                                                                                    |                                                                                          |
|------------------|----|-------------------------------------------------------------------------------------------------------------------------------------------------------------------------------------------------------------------------------------------------------------------------------------------------------------------------------------------------|--|--------------------------------------------------------------------------------------------------------------------------------------------------------------------------------------------------------------------------------------------------------------------------------------------------------------------|------------------------------------------------------------------------------------------|
|                  |    |                                                                                                                                                                                                                                                                                                                                                 |  | databases. The methods of linkage and methods of linkage quality evaluation should be provided.                                                                                                                                                                                                                    |                                                                                          |
| <b>Results</b>   |    |                                                                                                                                                                                                                                                                                                                                                 |  |                                                                                                                                                                                                                                                                                                                    |                                                                                          |
| Participants     | 13 | (a) Report the numbers of individuals at each stage of the study ( <i>e.g.</i> , numbers potentially eligible, examined for eligibility, confirmed eligible, included in the study, completing follow-up, and analysed)<br>(b) Give reasons for non-participation at each stage.<br>(c) Consider use of a flow diagram                          |  | RECORD 13.1: Describe in detail the selection of the persons included in the study ( <i>i.e.</i> , study population selection) including filtering based on data quality, data availability and linkage. The selection of included persons can be described in the text and/or by means of the study flow diagram. | (13.1) Results, paragraphs 1                                                             |
| Descriptive data | 14 | (a) Give characteristics of study participants ( <i>e.g.</i> , demographic, clinical, social) and information on exposures and potential confounders<br>(b) Indicate the number of participants with missing data for each variable of interest<br>(c) <i>Cohort study</i> - summarise follow-up time ( <i>e.g.</i> , average and total amount) |  |                                                                                                                                                                                                                                                                                                                    | (a) Results, paragraph 1-2, Table 1, S1 Table<br>(b) Table 1<br>(c) Results, paragraph 2 |
| Outcome data     | 15 | <i>Cohort study</i> - Report numbers of outcome events or summary measures over time<br><i>Case-control study</i> - Report numbers in each exposure category, or summary measures of exposure<br><i>Cross-sectional study</i> - Report numbers of outcome events or summary measures                                                            |  |                                                                                                                                                                                                                                                                                                                    | Results, paragraph 2<br>Table 2                                                          |
| Main results     | 16 | (a) Give unadjusted estimates and, if applicable, confounder-                                                                                                                                                                                                                                                                                   |  |                                                                                                                                                                                                                                                                                                                    | (16.a) Results, paragraph 2                                                              |

|    |                          |                                                                                                                                                   |                                                                                                                                                                            |                                                                                                                                                                                                                                                                                                          |                             |
|----|--------------------------|---------------------------------------------------------------------------------------------------------------------------------------------------|----------------------------------------------------------------------------------------------------------------------------------------------------------------------------|----------------------------------------------------------------------------------------------------------------------------------------------------------------------------------------------------------------------------------------------------------------------------------------------------------|-----------------------------|
| 1  |                          | adjusted estimates and their precision (e.g., 95% confidence interval). Make clear which confounders were adjusted for and why they were included |                                                                                                                                                                            |                                                                                                                                                                                                                                                                                                          | Table 2                     |
| 2  |                          | (b) Report category boundaries when continuous variables were categorized                                                                         |                                                                                                                                                                            |                                                                                                                                                                                                                                                                                                          | (16.b) Results, paragraph 3 |
| 3  |                          | (c) If relevant, consider translating estimates of relative risk into absolute risk for a meaningful time period                                  |                                                                                                                                                                            |                                                                                                                                                                                                                                                                                                          | Tables 3                    |
| 4  |                          |                                                                                                                                                   |                                                                                                                                                                            |                                                                                                                                                                                                                                                                                                          | Figure 1                    |
| 5  |                          |                                                                                                                                                   |                                                                                                                                                                            |                                                                                                                                                                                                                                                                                                          | (16.c) Results, paragraph 3 |
| 6  |                          |                                                                                                                                                   |                                                                                                                                                                            |                                                                                                                                                                                                                                                                                                          |                             |
| 7  |                          |                                                                                                                                                   |                                                                                                                                                                            |                                                                                                                                                                                                                                                                                                          |                             |
| 8  |                          |                                                                                                                                                   |                                                                                                                                                                            |                                                                                                                                                                                                                                                                                                          |                             |
| 9  |                          |                                                                                                                                                   |                                                                                                                                                                            |                                                                                                                                                                                                                                                                                                          |                             |
| 10 |                          |                                                                                                                                                   |                                                                                                                                                                            |                                                                                                                                                                                                                                                                                                          |                             |
| 11 |                          |                                                                                                                                                   |                                                                                                                                                                            |                                                                                                                                                                                                                                                                                                          |                             |
| 12 |                          |                                                                                                                                                   |                                                                                                                                                                            |                                                                                                                                                                                                                                                                                                          |                             |
| 13 |                          |                                                                                                                                                   |                                                                                                                                                                            |                                                                                                                                                                                                                                                                                                          |                             |
| 14 | Other analyses           | 17                                                                                                                                                | Report other analyses done—e.g., analyses of subgroups and interactions, and sensitivity analyses                                                                          |                                                                                                                                                                                                                                                                                                          | Results, paragraph 4        |
| 15 |                          |                                                                                                                                                   |                                                                                                                                                                            |                                                                                                                                                                                                                                                                                                          | S2 Table                    |
| 16 |                          |                                                                                                                                                   |                                                                                                                                                                            |                                                                                                                                                                                                                                                                                                          |                             |
| 17 |                          |                                                                                                                                                   |                                                                                                                                                                            |                                                                                                                                                                                                                                                                                                          |                             |
| 18 |                          |                                                                                                                                                   |                                                                                                                                                                            |                                                                                                                                                                                                                                                                                                          |                             |
| 19 | <b>Discussion</b>        |                                                                                                                                                   |                                                                                                                                                                            |                                                                                                                                                                                                                                                                                                          |                             |
| 20 | Key results              | 18                                                                                                                                                | Summarise key results with reference to study objectives                                                                                                                   |                                                                                                                                                                                                                                                                                                          | Discussion, paragraph 1-6   |
| 21 |                          |                                                                                                                                                   |                                                                                                                                                                            |                                                                                                                                                                                                                                                                                                          |                             |
| 22 | Limitations              | 19                                                                                                                                                | Discuss limitations of the study, taking into account sources of potential bias or imprecision. Discuss both direction and magnitude of any potential bias                 | RECORD 19.1: Discuss the implications of using data that were not created or collected to answer the specific research question(s). Include discussion of misclassification bias, unmeasured confounding, missing data, and changing eligibility over time, as they pertain to the study being reported. | Discussion, paragraph 7     |
| 23 |                          |                                                                                                                                                   |                                                                                                                                                                            |                                                                                                                                                                                                                                                                                                          |                             |
| 24 |                          |                                                                                                                                                   |                                                                                                                                                                            |                                                                                                                                                                                                                                                                                                          |                             |
| 25 |                          |                                                                                                                                                   |                                                                                                                                                                            |                                                                                                                                                                                                                                                                                                          |                             |
| 26 |                          |                                                                                                                                                   |                                                                                                                                                                            |                                                                                                                                                                                                                                                                                                          |                             |
| 27 |                          |                                                                                                                                                   |                                                                                                                                                                            |                                                                                                                                                                                                                                                                                                          |                             |
| 28 |                          |                                                                                                                                                   |                                                                                                                                                                            |                                                                                                                                                                                                                                                                                                          |                             |
| 29 |                          |                                                                                                                                                   |                                                                                                                                                                            |                                                                                                                                                                                                                                                                                                          |                             |
| 30 |                          |                                                                                                                                                   |                                                                                                                                                                            |                                                                                                                                                                                                                                                                                                          |                             |
| 31 | Interpretation           | 20                                                                                                                                                | Give a cautious overall interpretation of results considering objectives, limitations, multiplicity of analyses, results from similar studies, and other relevant evidence |                                                                                                                                                                                                                                                                                                          | Discussion, paragraph 8     |
| 32 |                          |                                                                                                                                                   |                                                                                                                                                                            |                                                                                                                                                                                                                                                                                                          |                             |
| 33 |                          |                                                                                                                                                   |                                                                                                                                                                            |                                                                                                                                                                                                                                                                                                          |                             |
| 34 |                          |                                                                                                                                                   |                                                                                                                                                                            |                                                                                                                                                                                                                                                                                                          |                             |
| 35 |                          |                                                                                                                                                   |                                                                                                                                                                            |                                                                                                                                                                                                                                                                                                          |                             |
| 36 |                          |                                                                                                                                                   |                                                                                                                                                                            |                                                                                                                                                                                                                                                                                                          |                             |
| 37 |                          |                                                                                                                                                   |                                                                                                                                                                            |                                                                                                                                                                                                                                                                                                          |                             |
| 38 |                          |                                                                                                                                                   |                                                                                                                                                                            |                                                                                                                                                                                                                                                                                                          |                             |
| 39 |                          |                                                                                                                                                   |                                                                                                                                                                            |                                                                                                                                                                                                                                                                                                          |                             |
| 40 | Generalisability         | 21                                                                                                                                                | Discuss the generalisability (external validity) of the study results                                                                                                      |                                                                                                                                                                                                                                                                                                          | Discussion, paragraph 8     |
| 41 |                          |                                                                                                                                                   |                                                                                                                                                                            |                                                                                                                                                                                                                                                                                                          |                             |
| 42 |                          |                                                                                                                                                   |                                                                                                                                                                            |                                                                                                                                                                                                                                                                                                          |                             |
| 43 | <b>Other information</b> |                                                                                                                                                   |                                                                                                                                                                            |                                                                                                                                                                                                                                                                                                          |                             |
| 44 |                          |                                                                                                                                                   |                                                                                                                                                                            |                                                                                                                                                                                                                                                                                                          |                             |

1  
2  
3  
4  
5  
6  
7  
8  
9  
10  
11  
12  
13  
14  
15  
16  
17  
18  
19  
20  
21  
22  
23  
24  
25  
26  
27  
28  
29  
30  
31  
32  
33  
34  
35  
36  
37  
38  
39  
40  
41  
42  
43  
44  
45  
46  
47

|         |    |                                                                                                                                                               |  |  |  |
|---------|----|---------------------------------------------------------------------------------------------------------------------------------------------------------------|--|--|--|
| Funding | 22 | Give the source of funding and the role of the funders for the present study and, if applicable, for the original study on which the present article is based |  |  |  |
|---------|----|---------------------------------------------------------------------------------------------------------------------------------------------------------------|--|--|--|

1  
2  
3  
4  
5  
6  
7  
8  
9  
10  
11  
12  
13  
14  
15  
16  
17  
18  
19  
20  
21  
22  
23  
24  
25  
26  
27  
28  
29  
30  
31  
32  
33  
34  
35  
36  
37  
38  
39  
40  
41  
42  
43  
44  
45  
46  
47

\*Reference: Benchimol EI, Smeeth L, Guttman A, Harron K, Moher D, Petersen I, Sørensen HT, von Elm E, Langan SM, the RECORD Working Committee. The Reporting of studies Conducted using Observational Routinely-collected health Data (RECORD) Statement. *PLoS Medicine* 2015; in press.

\*Checklist is protected under Creative Commons Attribution ([CC BY](https://creativecommons.org/licenses/by/4.0/)) license.

For peer review only
