# Supplementary material for: Association of body mass index and age with incident diabetes in Chinese adults: a population-based cohort study
Source: PubMed Central journal article supplement — BMJ Open. 2018 Sep 28;8(9):e021768. doi: 10.1136/bmjopen-2018-021768 (PMC6169758; doi:10.1136/bmjopen-2018-021768), 2018-09-28
Supplement: bmjopen-2018-021768supp001.pdf [file bmjopen-2018-021768supp001.pdf]

## Supplemental table 1

## Baseline characteristics of participants free of diabetes according to BMI groups

|                                | Body mass index, kg/m <sup>2</sup> |                   |                   |                   | P for trend |
|--------------------------------|------------------------------------|-------------------|-------------------|-------------------|-------------|
|                                | <18.5                              | 18.5-<24.0        | 24.0-<28.0        | ≥28               |             |
| <b>Male</b>                    |                                    |                   |                   |                   |             |
| Participants, n                | 3429                               | 52741             | 46159             | 13793             |             |
| BMI, kg/m <sup>2</sup>         | 17.6 (0.7)                         | 21.8 (1.5)        | 25.7 (1.1)        | 29.9 (1.9)        | < 0.0001    |
| Age, y                         | 36.6 (12.5)                        | 40.9 (12.9)       | 44.2 (12.8)       | 42.9 (12.5)       | < 0.0001    |
| Current smoker, %              | 28.8                               | 28.5              | 32.1              | 35.8              | < 0.0001    |
| Current drinker, %             | 1.7                                | 2.8               | 3.8               | 4.7               | < 0.0001    |
| Fasting plasma glucose, mmol/L | 4.76 (0.56)                        | 4.89 (0.60)       | 5.04 (0.63)       | 5.15 (0.67)       | < 0.0001    |
| Systolic blood pressure, mmHg  | 115 (14)                           | 120 (15)          | 125 (15)          | 130 (16)          | < 0.0001    |
| Diastolic blood pressure, mmHg | 72 (10)                            | 74 (10)           | 78 (11)           | 82 (11)           | < 0.0001    |
| Total cholesterol, mmol/L      | 4.26 (0.80)                        | 4.58 (0.86)       | 4.85 (0.89)       | 4.97 (0.89)       | < 0.0001    |
| Triglyceride, mmol/L           | 0.81 (0.62, 1.05)                  | 1.07 (0.77, 1.51) | 1.50 (1.05, 2.17) | 1.81 (1.30, 2.59) | < 0.0001    |
| LDL-C, mmol/L                  | 2.47 (0.62)                        | 2.71 (0.65)       | 2.85 (0.67)       | 2.91 (0.68)       | < 0.0001    |
| HDL-C, mmol/L                  | 1.44 (0.30)                        | 1.33 (0.28)       | 1.25 (0.27)       | 1.22 (0.27)       | < 0.0001    |
| Family history of diabetes, %  | 0.79                               | 1.24              | 1.52              | 1.85              | < 0.0001    |
| <b>Female</b>                  |                                    |                   |                   |                   |             |
| Participants, n                | 8652                               | 64070             | 18614             | 4373              |             |
| BMI, kg/m <sup>2</sup>         | 17.6 (0.7)                         | 21.2 (1.5)        | 25.5 (1.1)        | 30.1 (2.1)        | < 0.0001    |
| Age, y                         | 34.9 (9.2)                         | 40.6 (11.5)       | 47.7 (13.1)       | 48.5 (13.9)       | < 0.0001    |
| Current smoker, %              | 0.05                               | 0.14              | 0.17              | 0.01              | 0.80        |
| Current drinker, %             | 0.10                               | 0.15              | 0.10              | 0.21              | 0.008       |
| Fasting plasma glucose, mmol/L | 4.65 (0.55)                        | 4.80 (0.56)       | 5.02 (0.60)       | 5.16 (0.64)       | < 0.0001    |

|                                |                   |                   |                   |                   |          |
|--------------------------------|-------------------|-------------------|-------------------|-------------------|----------|
| Systolic blood pressure, mmHg  | 108 (13)          | 112 (15)          | 122 (18)          | 129 (18)          | < 0.0001 |
| Diastolic blood pressure, mmHg | 68 (9)            | 70 (10)           | 75 (11)           | 79 (12)           | < 0.0001 |
| Total cholesterol, mmol/L      | 4.43 (0.81)       | 4.62 (0.89)       | 4.92 (0.94)       | 5.03 (0.97)       | < 0.0001 |
| Triglyceride, mmol/L           | 0.70 (0.55, 0.90) | 0.81 (0.60, 1.12) | 1.16 (0.82, 1.67) | 1.43 (1.03, 2.00) | < 0.0001 |
| LDL-C, mmol/L                  | 2.52 (0.61)       | 2.70 (0.68)       | 2.91 (0.71)       | 2.97 (0.72)       | < 0.0001 |
| HDL-C, mmol/L                  | 1.59 (0.33)       | 1.49 (0.31)       | 1.39 (0.28)       | 1.34 (0.26)       | < 0.0001 |
| Family history of diabetes, %  | 1.86              | 2.82              | 3.14              | 3.50              | < 0.0001 |

---

Data are mean (SD), or median (IQR), or proportions.

Supplemental table 2

Sex-adjusted HRs of incident diabetes with increasing body mass index, by baseline age groups.

|           | Body mass index, kg/m <sup>2</sup> |                     |                      |                      |
|-----------|------------------------------------|---------------------|----------------------|----------------------|
|           | <18.5                              | 18.5-<24.0          | 24.0-<28.0           | ≥28                  |
| Age, y    |                                    |                     |                      |                      |
| 20 to <30 | 0.56 (0.18, 1.76)                  | 0.77 (0.48, 1.22)   | 1.43 (0.79, 2.61)    | 13.06 (8.98, 19.00)  |
| 30 to <40 | 0.51 (0.22, 1.15)                  | Ref.                | 4.06 (3.18, 5.18)    | 18.03 (14.28, 22.78) |
| 40 to <50 | 1.35 (0.50, 3.65)                  | 3.21 (2.50,4.12)    | 11.07 (8.86, 13.82)  | 28.83 (22.82, 36.42) |
| 50 to <60 | 5.05 (2.06, 12.41)                 | 11.16 (8.91,13.99)  | 22.40 (18.10, 27.72) | 47.17 (37.55, 59.24) |
| 60 to <70 | 18.25 (9.52, 34.97)                | 19.93 (15.85,25.06) | 33.35 (26.87, 41.39) | 48.51 (38.01, 61.92) |
| ≥70       | 7.90 (2.50, 24.91)                 | 32.19 (25.23,41.08) | 48.14 (38.19, 60.69) | 68.30 (51.99, 89.73) |

Supplemental table 3

Interaction of BMI × smoking status and age × family history of diabetes on the risk of incident diabetes.

|                                                 | HR               |                        |
|-------------------------------------------------|------------------|------------------------|
|                                                 | Unadjusted       | Multivariable-adjusted |
| Risk of per increase of BMI                     |                  |                        |
| Current smoker                                  | 1.84 (1.69-2.00) | 1.97 (1.80-2.15)       |
| Non-smoker                                      | 2.16 (1.76-2.64) | 2.34 (1.86-2.93)       |
| BMI × smoking status interaction, P             | 0.10             | 0.25                   |
| Risk of family history of diabetes              |                  |                        |
| Total                                           | 1.98 (1.70-2.31) | 1.68 (1.38-2.03)       |
| 20 to <30                                       | 2.13 (0.52-8.67) | 4.38 (0.82-23.39)      |
| 30 to <40                                       | 3.06 (2.23-4.21) | 2.81 (1.86-4.24)       |
| 40 to <50                                       | 2.10 (1.59-2.79) | 1.81 (1.25-2.64)       |
| 50 to <60                                       | 1.90 (1.43-2.52) | 1.80 (1.27-2.56)       |
| 60 to <70                                       | 2.04 (1.36-3.06) | 1.44 (0.85-2.42)       |
| ≥70                                             | 1.35 (0.43-4.20) | 0.78 (0.19-3.22)       |
| Age × family history of diabetes interaction, P | 0.45             | 0.71                   |

Multivariable-adjusted model adjusted for age, sex, smoking status, drinking status, family history of diabetes, except the strata variable.
